# Supplementary material for: CRL4-Cereblon complex in Thalidomide Embryopathy: a translational investigation
Source: PubMed Central journal article supplement (PMC6972723; doi:10.1038/s41598-020-57512-x), 2020-01-21
Supplement: 41598_2020_57512_MOESM1_ESM.pdf [file 41598_2020_57512_MOESM1_ESM.pdf]

## **Supplementary Tables 1-13**

### **CRL4-CEREBLON COMPLEX IN THALIDOMIDE EMBRYOPATHY: A TRANSLATIONAL INVESTIGATION**

Thayne Woycinck Kowalski

Julia do Amaral Gomes

Gabriela Barreto Caldas Garcia

Lucas Rosa Fraga

Vanessa Rodrigues Paixao-Cortes

Mariana Recamonde-Mendoza

Maria Teresa Vieira Sanseverino

Lavinia Schuler-Faccini

Fernanda Sales Luiz Vianna

**Table S1: Anomalies and respective frequencies described, for TE individuals**

| <b>Location/anomaly</b>         | <b>Number of cases</b> | <b>Frequency (%)</b> |
|---------------------------------|------------------------|----------------------|
| <b>Upper limbs (bilateral)</b>  | <b>24/25</b>           | <b>96%</b>           |
| Intercalary transverse          | 14/25                  | 56%                  |
| Preaxial longitudinal           | 10/25                  | 40%                  |
| <b>Lower Limbs (bilateral)</b>  | <b>12/25</b>           | <b>48%</b>           |
| Intercalary transverse          | 10/25                  | 40%                  |
| Preaxial longitudinal           | 2/25                   | 8%                   |
| <b>Other External Anomalies</b> |                        |                      |
| Ears                            | 4/26                   | 15,4%                |
| Eyes                            | 7/24                   | 29,2%                |
| Oral Cavity                     | 2/26                   | 7,7%                 |
| <b>Internal Anomalies</b>       |                        |                      |
| Neurological Anomalies          | 4/26                   | 15,4%                |
| Heart                           | 3/26                   | 11,5%                |
| Urinary Tract                   | 2/26                   | 7,7%                 |
| Genital Tract                   | 3/26                   | 11,5%                |
| Digestive Tract                 | 1/26                   | 3,8%                 |
| Skeletal                        | 4/26                   | 15,4%                |

**Table S2: Variants Identified in Gene Panel**

| Gene | Chromosome | Transcript (NM) | hg19 Position | ID           | Type  | Ref/Alt Alleles | Location | MAF (gnomAD NFE)    |
|------|------------|-----------------|---------------|--------------|-------|-----------------|----------|---------------------|
| CRBN | 3          | NM_016302       | 3:3190384     | rs986089106  | SNV   | G/C             | 3'UTR    | 0.0000667468 (C)    |
| CRBN | 3          | NM_016302       | 3:3190451     | rs711629     | SNV   | G/A             | 3'UTR    | 0.001 (G)           |
| CRBN | 3          | NM_016302       | 3:3190488     | rs145143419  | INDEL | T/TATTA         | 3'UTR    | 0.426 (T)           |
| CRBN | 3          | NM_016302       | 3:3190499     | rs577255886  | INDEL | T/TA            | 3'UTR    | 0.082 (TA)          |
| CRBN | 3          | NM_016302       | 3:3190582     | rs74407198   | SNV   | C/T             | 3'UTR    | 4.00855e-04 (T)     |
| CRBN | 3          | NM_016302       | 3:3190636     | rs201166570  | INDEL | C/CTATT         | 3'UTR    | 8.76885e-05 (TATT)  |
| CRBN | 3          | NM_016302       | 3:3191257     | rs142694504  | INDEL | C/CTGGGATCCACT  | 3'UTR    | 0.01 (CTGGGATCCACT) |
| CRBN | 3          | NM_016302       | 3:3191290     | rs62228639   | SNV   | C/T             | 3'UTR    | 0.01 (T)            |
| CRBN | 3          | NM_016302       | 3:3191336     | rs200410867  | INDEL | T/TTAAAG        | 3'UTR    | 0.015 (TAAAG)       |
| CRBN | 3          | NM_016302       | 3:3191388     | rs711628     | SNV   | T/A             | 3'UTR    | 0.001 (T)           |
| CRBN | 3          | NM_016302       | 3:3191404     | rs62228640   | SNV   | A/G             | 3'UTR    | 0.01 (G)            |
| CRBN | 3          | NM_016302       | 3:3191426     | rs1045433    | SNV   | T/C             | 3'UTR    | 0.152 (C)           |
| CRBN | 3          | NM_016302       | 3:3191558     | rs186184293  | SNV   | C/T             | 3'UTR    | 0.001 (T)           |
| CRBN | 3          | NM_016302       | 3:3191665     | rs182636108  | SNV   | A/G             | 3'UTR    | 0.002 (G)           |
| CRBN | 3          | NM_016302       | 3:3191770     | rs1047568248 | SNV   | G/C             | 3'UTR    | 6.67557e-05 (C)     |
| CRBN | 3          | NM_016302       | 3:3191776     | rs711627     | SNV   | T/C             | 3'UTR    | 0.001 (T)           |
| CRBN | 3          | NM_016302       | 3:3191813     | rs1497       | SNV   | T/G             | 3'UTR    | 0.026 (G)           |
| CRBN | 3          | NM_016302       | 3:3191833     | rs1499       | SNV   | A/G             | 3'UTR    | 0.027 (G)           |
| CRBN | 3          | NM_016302       | 3:3191956     | rs76212525   | SNV   | G/C             | 3'UTR    | 0.058 (C)           |
| CRBN | 3          | NM_016302       | 3:3192246     | rs551497808  | SNV   | A/G             | 3'UTR    | 0.002 (G)           |
| CRBN | 3          | NM_016302       | 3:3192524     | rs4183       | INDEL | A/ATAAC         | 3'UTR    | 0.335 (A)           |
| CRBN | 3          | NM_016302       | 3:3194088     | rs62228641   | SNV   | C/T             | Intron   | 0.002 (T)           |
| CRBN | 3          | NM_016302       | 3:3194308     | rs199995326  | SNV   | C/T             | Intron   | 6.67379e-05 (T)     |
| CRBN | 3          | NM_016302       | 3:3194369     | rs17027520   | SNV   | T/G             | Intron   | 0.010 (G)           |
| CRBN | 3          | NM_016302       | 3:3195325     | rs17027577   | SNV   | T/C             | Intron   | 0.01 (C)            |

|      |    |           |             |             |     |       |                  |                 |
|------|----|-----------|-------------|-------------|-----|-------|------------------|-----------------|
| CRBN | 3  | NM_016302 | 3:3195351   | rs6793531   | SNV | G/A   | Intron           | 2.66667e-04 (A) |
| CRBN | 3  | NM_016302 | 3:3195369   | rs73005226  | SNV | A/G   | Intron           | 0.142 (G)       |
| CRBN | 3  | NM_016302 | 3:3195574   | rs3846135   | SNV | C/T   | Intron           | 0.142 (T)       |
| CRBN | 3  | NM_016302 | 3:3195850   | rs12635247  | SNV | C/G/T | Intron           | 0.025 (G)       |
| CRBN | 3  | NM_016302 | 3:3197800   | rs11462347  | SNV | A/G   | Intron           | 0.025 (G)       |
| CRBN | 3  | NM_016302 | 3:3197871   | rs1705789   | SNV | T/C   | Intron           | 0.001 (T)       |
| CRBN | 3  | NM_016302 | 3:3197918   | rs17027638  | SNV | A/G   | Exon             | 0.020 (G)       |
| CRBN | 3  | NM_016302 | 3:3209242   | rs4685612   | SNV | G/T   | Intron           | 0.141 (T)       |
| CRBN | 3  | NM_016302 | 3:3209655   | rs1672761   | SNV | A/T   | Intron           | 0.197 (A)       |
| CRBN | 3  | NM_016302 | 3:3214576   | rs199841185 | SNV | T/G   | Exon             | 5.37548e-05 (G) |
| CRBN | 3  | NM_016302 | 3:3214635   | rs750754659 | SNV | G/A   | Intron           | 0.000 (A)       |
| CRBN | 3  | NM_016302 | 3:3215954   | rs1669321   | SNV | A/G   | Intron           | 0.001 (A)       |
| CRBN | 3  | NM_016302 | 3:3221060   | rs1627185   | SNV | G/A/C | Intron           | 0.210 (G)       |
| CRBN | 3  | NM_016302 | 3:3221430   | rs1672753   | SNV | C/T   | Upstream         | 0.194 (C)       |
| DDB1 | 11 | NM_001923 | 11:61067254 | rs1132797   | SNV | T/C   | 3'UTR            | 4.02685e-04 (C) |
| DDB1 | 11 | NM_001923 | 11:61071331 | rs28720346  | SNV | C/T   | Splicing, Intron | 0.001 (T)       |
| DDB1 | 11 | NM_001923 | 11:61071518 | rs201237741 | SNV | C/A   | Intron           | 3.42645e-04 (A) |
| DDB1 | 11 | NM_001932 | 11:61076372 | rs11230664  | SNV | T/C   | Intron           | 0.009 (C)       |
| DDB1 | 11 | NM_001923 | 11:61077474 | rs28720330  | SNV | T/C   | Intron           | 1.16678e-04 (C) |
| DDB1 | 11 | NM_001923 | 11:61077489 | rs28720329  | SNV | A/G   | Intron           | 1.99840e-04 (G) |
| DDB1 | 11 | NM_001923 | 11:61079175 | rs11230667  | SNV | G/A   | Intron           | 0.004 (A)       |
| DDB1 | 11 | NM_001923 | 11:61079415 | rs28720314  | SNV | A/T   | Intron           | 1.16373e-04 (T) |
| DDB1 | 11 | NM_001923 | 11:61083715 | rs28720301  | SNV | A/T   | Intron           | 0.001 (T)       |
| DDB1 | 11 | NM_001923 | 11:61084180 | rs12289370  | SNV | A/G   | Intron           | 0.010 (G)       |
| DDB1 | 11 | NM_001923 | 11:61089037 | rs12290116  | SNV | T/C   | Intron           | 0.004 (C)       |
| DDB1 | 11 | NM_001923 | 11:61089771 | rs28720291  | SNV | C/T   | Exon             | 0.009 (T)       |
| DDB1 | 11 | NM_001923 | 11:61092991 | ND          | SNV | G/T   | Intron           | ND              |
| DDB1 | 11 | NM_001923 | 11:61093245 | rs7108142   | SNV | A/G   | Intron           | 0.004 (G)       |

|       |    |              |              |             |       |        |                          |                 |
|-------|----|--------------|--------------|-------------|-------|--------|--------------------------|-----------------|
| DDB1  | 11 | NM_001923    | 11:61097362  | rs28720259  | SNV   | T/C    | Intron                   | 0.002 (C)       |
| DDB1  | 11 | NM_001923    | 11:61099072  | rs2230356   | SNV   | G/A    | Exon                     | 0.109 (A)       |
| DDB1  | 11 | NM_001923    | 11:61100336  | rs56269746  | SNV   | C/G    | Upstream                 | 0.001 (G)       |
| DDB1  | 11 | NM_001923    | 11:61100471  | rs369927446 | SNV   | G/C    | Upstream                 | 0.000 (T)       |
| CUL4A | 13 | NM_001008895 | 13:113864488 | rs970214412 | SNV   | G/A    | Intron                   | 0.000 (A)       |
| CUL4A | 13 | NM_001008895 | 13:113872978 | rs116151161 | SNV   | G/T    | Intron                   | 0.000 (T)       |
| CUL4A | 13 | NM_001008895 | 13:113883738 | rs180741517 | SNV   | G/T    | Intron                   | 0.003 (T)       |
| CUL4A | 13 | NM_001008895 | 13:113883851 | rs115418707 | SNV   | G/A    | Intron                   | 6.65956e-05 (A) |
| CUL4A | 13 | NM_001008895 | 13:113887281 | rs2287245   | SNV   | C/T    | Intron                   | 0.001 (T)       |
| CUL4A | 13 | NM_001008895 | 13:113888049 | rs931459769 | SNV   | C/T    | Intron                   | 0.000 (T)       |
| CUL4A | 13 | NM_001008895 | 13:113888201 | rs2146408   | SNV   | T/C    | Intron                   | 0.001 (T)       |
| CUL4A | 13 | NM_001008895 | 13:113889355 | rs2287249   | SNV   | A/G    | Intron                   | 0.234 (G)       |
| CUL4A | 13 | NM_001008895 | 13:113889474 | rs2287250   | SNV   | C/T    | Intron                   | 0.253 (C)       |
| CUL4A | 13 | NM_001008895 | 13:113889482 | rs541918654 | SNV   | G/A    | Intron                   | 3.65965e-05 (A) |
| CUL4A | 13 | NM_001008895 | 13:113889499 | rs2287251   | SNV   | A/G    | Intron                   | 0.252 (G)       |
| CUL4A | 13 | NM_001008895 | 13:113890981 | rs772518711 | INDEL | AGTC/A | Intron                   | 0.001 (A)       |
| CUL4A | 13 | NM_001008895 | 13:113891042 | rs2287252   | SNV   | T/C    | Intron                   | 0.001 (C)       |
| CUL4A | 13 | NM_001008895 | 13:113891075 | rs2287253   | SNV   | G/A    | Intron                   | 0.252 (G)       |
| CUL4A | 13 | NM_001008895 | 13:113893728 | rs770953960 | SNV   | C/T    | Intron                   | 2.68827e-05 (T) |
| CUL4A | 13 | NM_001008895 | 13:113893729 | rs3794422   | SNV   | G/A    | Intron                   | 0.233 (A)       |
| CUL4A | 13 | NM_001008895 | 13:113893887 | rs3794423   | SNV   | C/T    | Intron                   | 4.67211e-04 (T) |
| CUL4A | 13 | NM_001008895 | 13:113897320 | rs3764124   | SNV   | C/T    | Exon                     | 0.251 (T)       |
| CUL4A | 13 | NM_001008895 | 13:113899321 | rs138961957 | SNV   | G/T    | Exon                     | 6.66311e-05 (T) |
| CUL4A | 13 | NM_001008895 | 13:113899447 | rs61967871  | SNV   | C/A    | Intron                   | 0.027 (A)       |
| CUL4A | 13 | NM_001008895 | 13:113900197 | rs2302756   | SNV   | G/A    | Intron                   | 0.252 (G)       |
| CUL4A | 13 | NM_001008895 | 13:113907391 | rs9549365   | SNV   | A/G    | Splicing Site,<br>Intron | 0.252 (G)       |
| CUL4A | 13 | NM_001008895 | 13:113908995 | rs374602605 | SNV   | C/T    | Intron                   | 1.99947e-04 (T) |

|       |    |              |              |             |       |         |            |                 |
|-------|----|--------------|--------------|-------------|-------|---------|------------|-----------------|
| CUL4A | 13 | NM_001008895 | 13:113909339 | rs2302757   | SNV   | A/G     | Exon       | 0.2353 (G)      |
| CUL4A | 13 | NM_001008895 | 13:113914596 | rs9549720   | SNV   | A/G     | Intron     | 0.001 (A)       |
| CUL4A | 13 | NM_001008895 | 13:113914625 | rs111864659 | SNV   | G/A     | Intron     | 0.000 (A)       |
| CUL4A | 13 | NM_001008895 | 13:113914812 | rs111568611 | SNV   | C/T     | Intron     | 0.012 (T)       |
| CUL4A | 13 | NM_001008895 | 13:113917604 | rs150151004 | SNV   | T/A     | Intron     | 0.004 (A)       |
| CUL4A | 13 | NM_001008895 | 13:113917767 | rs4907602   | SNV   | T/C     | Intron     | 0.001 (T)       |
| CUL4A | 13 | NM_001008895 | 13:113917979 | rs201687311 | INDEL | CTGAT/C | 3'UTR      | 0.000 (C)       |
| CUL4A | 13 | NM_001008895 | 13:113918184 | rs138211925 | SNV   | T/A     | 3'UTR      | 1.99814e-04 (A) |
| CUL4A | 13 | NM_001008895 | 13:113918770 | rs11552924  | SNV   | A/C     | 3'UTR      | 0.043 (C)       |
| CUL4A | 13 | NM_001008895 | 13:113918897 | rs41286616  | SNV   | G/A     | 3'UTR      | 0.004 (A)       |
| CUL4A | 13 | NM_001008895 | 13:113919455 | rs116011085 | SNV   | G/A     | Downstream | 0.000 (A)       |
| IKZF1 | 7  | NM_006060    | 7:50344389   | rs543438548 | SNV   | C/T     | 5'UTR      | 0.000 (T)       |
| IKZF1 | 7  | NM_006060    | 7:50344474   | rs6975767   | SNV   | A/C     | 5'UTR      | 0.378 (C)       |
| IKZF1 | 7  | NM_006060    | 7:50344544   | rs11506039  | SNV   | A/G     | Intron     | 0.012 (G)       |
| IKZF1 | 7  | NM_006060    | 7:50443928   | rs74828745  | SNV   | A/G     | Intron     | 0.033 (G)       |
| IKZF1 | 7  | NM_006060    | 7:50444025   | rs113125091 | SNV   | C/T     | Intron     | 0.080 (T)       |
| IKZF1 | 7  | NM_006060    | 7:50444040   | rs74412507  | SNV   | G/A     | Intron     | 0.079 (A)       |
| IKZF1 | 7  | NM_006060    | 7:50450420   | rs7789106   | SNV   | T/C     | Intron     | 0.011 (C)       |
| IKZF1 | 7  | NM_006060    | 7:50450446   | rs113962761 | SNV   | C/T     | Intron     | 0.085 (T)       |
| IKZF1 | 7  | NM_006060    | 7:50454736   | rs6962370   | SNV   | A/G     | Intron     | 0.196 (G)       |
| IKZF1 | 7  | NM_006060    | 7:50454805   | rs75866857  | SNV   | A/G     | Intron     | 0.079 (G)       |
| IKZF1 | 7  | NM_006060    | 7:50454980   | rs56278999  | SNV   | A/T     | Intron     | 0.078 (T)       |
| IKZF1 | 7  | NM_006060    | 7:50459405   | rs78889803  | SNV   | G/A     | Intron     | 3.33156e-04 (A) |
| IKZF1 | 7  | NM_006060    | 7:50459406   | rs771199279 | INDEL | CCT/C   | Intron     | 8.96877e-06 (C) |
| IKZF1 | 7  | NM_006060    | 7:50467767   | rs61731355  | SNV   | C/A     | Exon       | 0.197 (A)       |
| IKZF1 | 7  | NM_006060    | 7:50467941   | rs61731356  | SNV   | C/T     | Exon       | 0.047 (T)       |
| IKZF1 | 7  | NM_006060    | 7:50468334   | rs72645704  | SNV   | C/T     | 3'UTR      | 0.051 (T)       |
| IKZF1 | 7  | NM_006060    | 7:50468685   | 0000439108* | SNV   | A/G     | 3'UTR      | ND              |

|       |    |           |             |             |       |      |            |                 |
|-------|----|-----------|-------------|-------------|-------|------|------------|-----------------|
| IKZF1 | 7  | NM_006060 | 7:50468952  | rs10278451  | SNV   | G/T  | 3'UTR      | 0.275 (T)       |
| IKZF1 | 7  | NM_006060 | 7:50469397  | rs73114989  | SNV   | G/C  | 3'UTR      | 0.030 (C)       |
| IKZF1 | 7  | NM_006060 | 7:50469551  | rs11552047  | SNV   | C/T  | 3'UTR      | 0.275 (T)       |
| IKZF1 | 7  | NM_006060 | 7:50469613  | rs34234461  | INDEL | TA/T | 3'UTR      | 0.048 (T)       |
| IKZF1 | 7  | NM_006060 | 7:50469710  | rs149985644 | SNV   | C/T  | 3'UTR      | 0.002 (T)       |
| IKZF1 | 7  | NM_006060 | 7:50469751  | rs114837302 | SNV   | C/T  | 3'UTR      | 1.99973e-04 (T) |
| IKZF1 | 7  | NM_006060 | 7:50469779  | rs75168275  | SNV   | C/A  | 3'UTR      | 0.000 (A)       |
| IKZF1 | 7  | NM_006060 | 7:50469981  | rs11980379  | SNV   | T/C  | 3'UTR      | 0.275 (T)       |
| IKZF1 | 7  | NM_006060 | 7:50470138  | rs62447207  | SNV   | G/T  | 3'UTR      | 0.197 (T)       |
| IKZF1 | 7  | NM_006060 | 7:50470156  | rs62447208  | SNV   | G/C  | 3'UTR      | 0.198 (C)       |
| IKZF1 | 7  | NM_006060 | 7:50470256  | rs58184950  | SNV   | G/A  | 3'UTR      | 0.048 (A)       |
| IKZF1 | 7  | NM_006060 | 7:50470378  | rs33999320  | INDEL | T/TC | 3'UTR      | 0.275 (C)       |
| IKZF1 | 7  | NM_006060 | 7:50470604  | rs4132601   | SNV   | T/G  | 3'UTR      | 0.275 (G)       |
| IKZF1 | 7  | NM_006060 | 7:50470813  | 0000439110* | SNV   | G/A  | 3'UTR      | ND              |
| IKZF1 | 7  | NM_006060 | 7:50471038  | rs114737126 | SNV   | G/A  | 3'UTR      | 0.001 (A)       |
| IKZF1 | 7  | NM_006060 | 7:50471397  | rs72645705  | SNV   | A/G  | 3'UTR      | 0.048 (G)       |
| IKZF1 | 7  | NM_006060 | 7:50471613  | rs11980407  | SNV   | G/A  | 3'UTR      | 0.275 (A)       |
| IKZF1 | 7  | NM_006060 | 7:50472324  | rs62445866  | SNV   | G/A  | 3'UTR      | 0.275 (A)       |
| IKZF1 | 7  | NM_006060 | 7:50472738  | rs73695637  | SNV   | G/A  | 3'UTR      | 0.013 (A)       |
| IKZF1 | 7  | NM_006060 | 7:50472842  | rs58923657  | SNV   | C/T  | Downstream | 0.275 (T)       |
| IKZF3 | 17 | NM_012481 | 17:37921899 | rs2952141   | SNV   | C/T  | 3'UTR      | 0.000 (C)       |
| IKZF3 | 17 | NM_012481 | 17:37922804 | rs112876941 | SNV   | A/T  | Intron     | 0.043 (T)       |
| IKZF3 | 17 | NM_012481 | 17:37922259 | rs907092    | SNV   | G/A  | Exon       | 0.446 (A)       |
| IKZF3 | 17 | NM_012481 | 17:37933823 | rs12709364  | SNV   | A/G  | Intron     | 0.043 (A)       |
| IKZF3 | 17 | NM_012481 | 17:37944411 | rs34291217  | SNV   | C/A  | Intron     | 0.043 (A)       |
| IKZF3 | 17 | NM_012481 | 17:37944482 | rs35088469  | SNV   | C/T  | Intron     | 0.043 (T)       |
| IKZF3 | 17 | NM_012481 | 17:37944519 | rs112301322 | SNV   | C/G  | Exon       | 0.043 (G)       |
| IKZF3 | 17 | NM_012481 | 17:37948874 | rs3803795   | SNV   | C/T  | Intron     | 3.33200e-04 (T) |

|       |    |           |             |             |     |     |        |                 |
|-------|----|-----------|-------------|-------------|-----|-----|--------|-----------------|
| IKZF3 | 17 | NM_012481 | 17:37985618 | rs200283071 | SNV | T/C | Intron | 6.66134e-05 (T) |
| IKZF3 | 17 | NM_012481 | 17:37985779 | rs143669790 | SNV | G/A | Intron | 0.028 (A)       |
| IKZF3 | 17 | NM_012481 | 17:37985801 | rs3816470   | SNV | A/G | Intron | 0.481 (A)       |
| IKZF3 | 17 | NM_012481 | 17:37988293 | rs8069893   | SNV | C/T | Intron | 0.043 (T)       |
| IKZF3 | 17 | NM_012481 | 17:37988320 | rs16965361  | SNV | A/G | Intron | 0.034 (G)       |
| IKZF3 | 17 | NM_012481 | 17:37988470 | rs187289154 | SNV | A/G | Intron | 0.000 (G)       |
| IKZF3 | 17 | NM_012481 | 17:37988477 | rs111944912 | SNV | T/C | Intron | 0.043 (C)       |
| IKZF3 | 17 | NM_012481 | 17:38020419 | rs1453559   | SNV | T/C | 5'UTR  | 0.4919 (T)      |
| IKZF3 | 17 | NM_012481 | 17:38020421 | rs117278702 | SNV | G/A | 5'UTR  | 0.039 (A)       |

---

SNV: Single Nucleotide Variant; INDEL: Insertion-Deletion Variant; UTR: Untranslated Region; NFE: Non-Finnish European



**Table S3: List and characteristics of tools used in variants functional prediction**

| Predictor       | Link                                                                                                                                                              | Type of Variant | Characteristics                                                                                                                                                                                            | Reference                                                                                                                                                                                                 |
|-----------------|-------------------------------------------------------------------------------------------------------------------------------------------------------------------|-----------------|------------------------------------------------------------------------------------------------------------------------------------------------------------------------------------------------------------|-----------------------------------------------------------------------------------------------------------------------------------------------------------------------------------------------------------|
| Mutation Taster | <a href="http://mutationtaster.org">http://mutationtaster.org</a>                                                                                                 | Any             | Uses a Bayes classifier to generate predictions. Based on genomic databases, exon-intron junction and conservation analysis.                                                                               | Schwarz JM, Rödelberger C, Schuelke M, Seelow D. MutationTaster evaluates disease-causing potential of sequence alterations. <i>Nat Methods</i> 2010; <b>7</b> :575-576.                                  |
| HSF             | <a href="http://www.umd.be/HSF3/">http://www.umd.be/HSF3/</a>                                                                                                     | Any             | Predicts the effects of mutations on splicing signals. Identifies splicing motifs in any human sequence. It contains all available matrices for auxiliary sequence prediction.                             | Desmet FO, Hamroun D, Lalande M, Collod-Bérout G, Claustres M, Bérout C. Human Splicing Finder: an online bioinformatics tool to predict splicing signals. <i>Nucleic Acids Res</i> 2009; <b>37</b> :e67. |
| miRbase         | <a href="http://www.mirbase.org">http://www.mirbase.org</a>                                                                                                       | Any             | It is a primary microRNA repository, using deep sequencing data sets. Allows to determine the miRNAs aligned in each sequence.                                                                             | Kozomara A, Griffiths-Jones S. miRBase: annotating high confidence microRNAs using deep sequencing data. <i>Nucleic Acids Res</i> 2014; <b>42</b> :D68-73.                                                |
| motifBreakR     | <a href="https://bioconductor.org/packages/release/bioc/vignettes/motifbreakR/inst">https://bioconductor.org/packages/release/bioc/vignettes/motifbreakR/inst</a> | Any             | Works with position probability matrices (PPM), which contains information about the likelihood of observing a particular nucleotide at a particular position of a true transcription factor binding site. | Coetzee SG, Coetzee GA, Hazelett DJ. motifbreakR: an R/Bioconductor package for predicting variant effects at transcription factor                                                                        |

/doc/motifbreakR-vignette.html

binding sites. *Bioinformatics* 2015; **31**:3847-3849.

|               |                                                                                                                                 |          |                                                                                                                                                                                                                                                            |                                                                                                                                                                                            |
|---------------|---------------------------------------------------------------------------------------------------------------------------------|----------|------------------------------------------------------------------------------------------------------------------------------------------------------------------------------------------------------------------------------------------------------------|--------------------------------------------------------------------------------------------------------------------------------------------------------------------------------------------|
| CpG Island    | <a href="http://www.urogene.org/cgi-bin/methprimer/methprimer.cgi">http://www.urogene.org/cgi-bin/methprimer/methprimer.cgi</a> | Any      | Predicts CpG islands from an original DNA sequence and provides the virtual bisulfite conversion.                                                                                                                                                          | Li LC, Dahiya R. MethPrimer: designing primers for methylation PCRs. <i>Bioinformatics</i> 2002; <b>18</b> :1427-1431.                                                                     |
| EnhancerAtlas | <a href="http://www.enhanceratlas.org">http://www.enhanceratlas.org</a>                                                         | Any      | Annotation database of enhancers in human and mouse genome. Examines the experimental evidences for enhancers in a given genomic region, compares the enhancers across different cells and tissues, identifies the enhancers associated with a given gene. | Gao T, He B, Liu S, Zhu H, Tan K, Qian J. EnhancerAtlas: a resource for enhancer annotation and analysis in 105 human cell/tissue types. <i>Bioinformatics</i> 2016; <b>32</b> :3543-3551. |
| SIFT          | <a href="http://sift.jcvi.org">http://sift.jcvi.org</a>                                                                         | Missense | Uses an alignment based score to measure the change in sequence similarity, comparing to a protein homolog, before and after amino acid substitution.                                                                                                      | Choi Y, Sims GE, Murphy S, Miller JR, Chan AP. Predicting the functional effect of amino acid substitutions and indels. <i>PLoS One</i> 2012; <b>7</b> :e46688.                            |
| PolyPhen-2    | <a href="http://genetics.bwh.harvard.edu/pph2/">http://genetics.bwh.harvard.edu/pph2/</a>                                       | Missense | Uses eight sequence-based and three structure-based predictive features, selected by an algorithm, which compare the properties of the wild-type and mutated alleles.                                                                                      | Adzhubei I, Jordan DM, Sunyaev SR. Predicting functional effect of human missense mutations using PolyPhen-2. <i>Curr Protoc Hum Genet</i> 2013; <b>Chapter 7</b> :Unit7.20.               |

|              |                                                                                                                                                                                                     |            |                                                                                                                                                        |                                                                                                                                                                                                                          |
|--------------|-----------------------------------------------------------------------------------------------------------------------------------------------------------------------------------------------------|------------|--------------------------------------------------------------------------------------------------------------------------------------------------------|--------------------------------------------------------------------------------------------------------------------------------------------------------------------------------------------------------------------------|
| APASdb       | <a href="http://mosas.sysu.edu.cn/utr">http://mosas.sysu.edu.cn/utr</a>                                                                                                                             | Any        | Describes the polyadenylation consensus sequences, canonic and alternative ones, and describes which one is used in different tissues and transcripts. | You L, Wu J, Feng Y <i>et al.</i> APASdb: a database describing alternative poly(A) sites and selection of heterogeneous cleavage sites downstream of poly(A) signals. <i>Nucleic Acids Res</i> 2015; <b>43</b> :D59-67. |
| Haploview    | <a href="https://www.broadinstitute.org/haploview/haploview">https://www.broadinstitute.org/haploview/haploview</a>                                                                                 | SNVs       | Analyses and provides a graphic visualization of Linkage Disequilibrium (LD) between SNVs                                                              | Barrett JC, Fry B, Maller J, Daly MJ. Haploview: analysis and visualization of LD and haplotype maps. <i>Bioinformatics</i> 2005; <b>21</b> :263-265.                                                                    |
| SILVA        | <a href="http://compbio.cs.toronto.edu/silva/">http://compbio.cs.toronto.edu/silva/</a>                                                                                                             | Synonymous | Algorithm for prioritization and identification of disease-causing synonymous variants                                                                 | Buske OJ, Manickaraj A, Mital S, Ray PN, Brudno M. Identification of deleterious synonymous variants in human genomes. <i>Bioinformatics</i> 2013; <b>29</b> :1843-1850.                                                 |
| BiomaRt      | <a href="https://bioconductor.org/packages/development/bioc/vignettes/biomaRt/inst/doc/biomaRt.html">https://bioconductor.org/packages/development/bioc/vignettes/biomaRt/inst/doc/biomaRt.html</a> | Any        | R package developed by Ensembl database that combines data from different public repositories                                                          | Durinck S, Spellman PT, Birney E, Huber W. Mapping identifiers for the integration of genomic datasets with the R/Bioconductor package biomaRt. <i>Nat Protoc</i> 2009; <b>4</b> :1184-1191.                             |
| PredictSNP-2 | <a href="https://loschmidt.cemhi.muni.cz/predictsnp2/">https://loschmidt.cemhi.muni.cz/predictsnp2/</a>                                                                                             | SNVs       | Combines data from six predictors: CADD, DANN, FATHMM, FitCons, FunSeq2 and GWAVA, and provides an integrated score of deleteriousness.                | Bendl J, Musil M, Štourač J, Zendulka J, Damborský J, Brezovský J. PredictSNP2: A Unified Platform for Accurately Evaluating SNP Effects by Exploiting the Different Characteristics of Variants in Distinct             |

Genomic Regions. *PLoS Comput Biol*  
2016; **12**:e1004962.

RNA Fold

<http://rna.tbi.univie.ac.at/>

Exonic

Predicts messenger RNA (mRNA) secondary structure and free energy in its conformation.

Hofacker IL. Vienna RNA secondary structure server. *Nucleic Acids Res* 2003; **31**:3429-3431.

---

**Table S4: Scores attributed to each functional prediction**

| Predictor         | Impact                                         | Score | Observation   |
|-------------------|------------------------------------------------|-------|---------------|
| Mutation Taster   | Polymorphism                                   | 0     |               |
|                   | Splicing                                       | +1    |               |
|                   | Protein features might be affected             | +1    |               |
|                   | Disease causing                                | +3    |               |
|                   | Thalidomide site might be lost                 | +4    |               |
| HSF               | No alteration of splicing                      | 0     |               |
|                   | Alteration of ESSE/ESS                         | +1    | for each site |
|                   | Activation exonic cryptic acceptor/donor site  | +2    | for each site |
| miRbase           | miRNA non affected                             | 0     |               |
|                   | miRNA non related affected                     | +1    |               |
|                   | miRNA related affected                         | +2    | for each site |
| motifBreakR       | No TF related affected                         | 0     |               |
|                   | Alters TFs involved in embryogenesis           | +1    | for each site |
|                   | Alters TFs involved in limb development        | +2    | for each site |
|                   | Alters IKZF1, IKZF3 or MEIS2 binding site      | +3    | for each site |
| CpG Island        | No CpG island in the region                    | 0     |               |
|                   | Do not alter CpG Island                        | 0     |               |
|                   | Alters beginning/end of CpG Island             | +1    | for each site |
|                   | Creates or disrupts CpG island                 | +3    | for each site |
| EnhancerAtlas     | Do not have enhancer                           | 0     |               |
|                   | Inside enhancer of the gene                    | +1    | for each site |
|                   | Disrupts enhancer of the gene                  | +3    | for each site |
| SIFT              | Tolerated, likely benign, neutral              | 0     |               |
| PolyPhen-2        | Possibly Pathogenic                            | +2    |               |
| SILVA             | Pathogenic                                     | +4    |               |
| Síos de PoliA     | Disrupts any polyA site or consensus sequence  | +1    |               |
|                   | Disrupts main polyA site or consensus sequence | +2    |               |
| Haploview         | It is located in haplotypic block              | +1    |               |
| Fisher/Chi-Square | Allelic frequency after FDR <0.05              | +1    |               |
|                   | Genotypic frequency after FDR<0.05             | +1    |               |
| BiomaRt           | Clinical significance                          | +5    |               |
|                   | MAF<0.01                                       | +2    |               |
|                   | Splicing Site                                  | +1    |               |

|              |                            |    |
|--------------|----------------------------|----|
|              | Exonic                     | +2 |
|              | New variant                | +1 |
| <hr/>        |                            |    |
| Predict-SNP2 | Deleterious                | +1 |
|              | DANN Deleterious           | +1 |
| <hr/>        |                            |    |
| RNA Fold     | Alters mRNA stability      | +1 |
|              | Alters mRNA conformation   | +1 |
|              | Disrupts mRNA conformation | +2 |
| <hr/>        |                            |    |

**Table S5: Association between upper limbs anomalies and variants identified**

| <b>All Genes</b>       |          |                                |                 |                           |                 |
|------------------------|----------|--------------------------------|-----------------|---------------------------|-----------------|
| <b>Type of Anomaly</b> | <b>N</b> | <b>Mean Number of Variants</b> | <b>P-Value*</b> | <b>Mean Heatmap Score</b> | <b>P-Value*</b> |
| Intercalary transverse | 14       | 32.43 ( $\pm 6.02$ )           | 0.141           | 195 ( $\pm 41.75$ )       | 0.048           |
| Pre-axial longitudinal | 10       | 36.70 ( $\pm 7.12$ )           |                 | 228.9 ( $\pm 34.9$ )      |                 |

\*t-Test

| <b>CRBN</b>            |          |                                |                 |                           |                 |
|------------------------|----------|--------------------------------|-----------------|---------------------------|-----------------|
| <b>Type of Anomaly</b> | <b>N</b> | <b>Mean Number of Variants</b> | <b>P-Value*</b> | <b>Mean Heatmap Score</b> | <b>P-Value*</b> |
| Intercalary transverse | 14       | 10.85 ( $\pm 2.44$ )           | 0.241           | 78 ( $\pm 18.37$ )        | 0.016           |
| Pre-axial longitudinal | 10       | 11.9 ( $\pm 1.79$ )            |                 | 94.9 ( $\pm 13.2$ )       |                 |

\*t-Test

**Table S6: Comparison of the presence of variants in Thalidomide Embryopathy Individuals and Europeans from the 1000Genomes project**

| <b>All Genes</b>        |          |                                |                 |                           |                 |
|-------------------------|----------|--------------------------------|-----------------|---------------------------|-----------------|
| <b>Groups</b>           | <b>N</b> | <b>Mean Number of Variants</b> | <b>P-Value*</b> | <b>Mean Heatmap Score</b> | <b>P-Value*</b> |
| Thalidomide Embryopathy | 35       | 36.17 (± 7.19)                 | <0.001          | 222.17 (± 44.84)          | <0.001          |
| Europeans 1000Genomes   | 99       | 29.96 (± 7.47)                 |                 | 179.39 (± 42.65)          |                 |

\*t-Test

| <b>CRL4 (CRBN + DDB1 + CUL4A)</b> |          |                                |                 |                           |                 |
|-----------------------------------|----------|--------------------------------|-----------------|---------------------------|-----------------|
| <b>Type of Anomaly</b>            | <b>N</b> | <b>Mean Number of Variants</b> | <b>P-Value*</b> | <b>Mean Heatmap Score</b> | <b>P-Value*</b> |
| Thalidomide Embryopathy           | 35       | 22.51 (±4.57)                  | <0.001          | 159.17 (± 35.55)          | 0.001           |
| Europeans 1000Genomes             | 99       | 18.8 (± 3.31)                  |                 | 134.61 (±28.66)           |                 |

\*t-Test

| <b>CRBN</b>             |          |                                |                 |                           |                 |
|-------------------------|----------|--------------------------------|-----------------|---------------------------|-----------------|
| <b>Type of Anomaly</b>  | <b>N</b> | <b>Mean Number of Variants</b> | <b>P-Value*</b> | <b>Mean Heatmap Score</b> | <b>P-Value*</b> |
| Thalidomide Embryopathy | 35       | 11.71 (± 2.24)                 | 0.001           | 87.94 (± 17.88)           | 0.038           |
| Europeans 1000Genomes   | 99       | 10.21 (± 1.83)                 |                 | 80.60 (± 16.52)           |                 |

\*t-Test

| <b>DDB1</b>             |          |                                |                 |                           |                 |
|-------------------------|----------|--------------------------------|-----------------|---------------------------|-----------------|
| <b>Type of Anomaly</b>  | <b>N</b> | <b>Mean Number of Variants</b> | <b>P-Value*</b> | <b>Mean Heatmap Score</b> | <b>P-Value*</b> |
| Thalidomide Embryopathy | 35       | 1.97 (± 2.71)                  | 0.001           | 14.37 (± 19.34)           | <0.001          |
| Europeans 1000Genomes   | 99       | 0.22 (± 0.44)                  |                 | 1.43 (± 3.01)             |                 |

\*t-Test

| <b>CUL4A</b>            |          |                                |                 |                           |                 |
|-------------------------|----------|--------------------------------|-----------------|---------------------------|-----------------|
| <b>Type of Anomaly</b>  | <b>N</b> | <b>Mean Number of Variants</b> | <b>P-Value*</b> | <b>Mean Heatmap Score</b> | <b>P-Value*</b> |
| Thalidomide Embryopathy | 35       | 8.86 (± 2.71)                  | 0.362           | 56.86 (± 22.78)           | 0.346           |
| Europeans 1000Genomes   | 99       | 8.36 (± 2.79)                  |                 | 52.57 (± 22.33)           |                 |

\*t-Test

| <b>IKZF1</b>            |          |                                |                 |                           |                 |
|-------------------------|----------|--------------------------------|-----------------|---------------------------|-----------------|
| <b>Type of Anomaly</b>  | <b>N</b> | <b>Mean Number of Variants</b> | <b>P-Value*</b> | <b>Mean Heatmap Score</b> | <b>P-Value*</b> |
| Thalidomide Embryopathy | 35       | 9.51 (± 6.47)                  | 0.073           | 49.8 (± 31.32)            | 0.006           |
| Europeans 1000Genomes   | 99       | 7.23 (± 6.00)                  |                 | 32.6 (± 27.14)            |                 |

\*t-Test



**IKZF3**

| <b>Type of Anomaly</b>  | <b>N</b> | <b>Mean Number of Variants</b> | <b>P-Value*</b> | <b>Mean Heatmap Score</b> | <b>P-Value*</b> |
|-------------------------|----------|--------------------------------|-----------------|---------------------------|-----------------|
| Thalidomide Embryopathy | 35       | 4.14 ( $\pm$ 2.04)             | 0.609           | 13.2 ( $\pm$ 9.15)        | 0.575           |
| Europeans 1000Genomes   | 99       | 3.94 ( $\pm$ 1.9)              |                 | 12.18 ( $\pm$ 9.27)       |                 |

\*t-Test

**Table S7: ANOVA test between individuals with pre-axial longitudinal limb anomalies vs. Intercalary transverse limb anomalies vs. Europeans from the 1000Genomes project**

| <b>Presence of Variants (Absolute Number)</b> |          |                |
|-----------------------------------------------|----------|----------------|
| <b>Genes</b>                                  | <b>F</b> | <b>P-Value</b> |
| CRBN + DDB1 + CUL4A + IKZF1 + IKZF3           | 4.252    | 0.016          |
| CRBN + DDB1 + CUL4A                           | 6.717    | 0.002          |
| CRBN                                          | 3.961    | 0.022          |
| DDB1                                          | 16.124   | <0.001         |
| CUL4A                                         | 0.116    | 0.891          |
| IKZF1                                         | 0.784    | 0.459          |
| IKZF3                                         | 0.397    | 0.673          |

| <b>Heatmap Score</b>                |          |                |
|-------------------------------------|----------|----------------|
| <b>Genes</b>                        | <b>F</b> | <b>P-Value</b> |
| CRBN + DDB1 + CUL4A + IKZF1 + IKZF3 | 6.731    | 0.002          |
| CRBN + DDB1 + CUL4A                 | 4.799    | 0.01           |
| CRBN                                | 3.753    | 0.026          |
| DDB1                                | 16.609   | <0.001         |
| CUL4A                               | 0.122    | 0.885          |
| IKZF1                               | 1.672    | 0.192          |
| IKZF3                               | 0.751    | 0.474          |

**Table S8: Association between rs1045433 genotypes and patten of upper limb anomalies in TE individuals**

| <b>CRBN - rs1045433</b> |                                     |                                     |                 |
|-------------------------|-------------------------------------|-------------------------------------|-----------------|
| <b>Genotypes</b>        | <b>Intercalary Transverse n (%)</b> | <b>Pre-Axial Longitudinal n (%)</b> | <b>P-Value*</b> |
| TT                      | 13 (92.9%)                          | 4 (40%)                             | 0.004           |
| TC                      | 1 (7.1%)                            | 2 (20%)                             |                 |
| CC                      | 0 (0%)                              | 4 (40%)                             |                 |

\*Fisher's Exact Test

**Table S9. Differential Gene Expression of CRL4-CRBN Genes in Embryonal Human First to Fifth Digits**

| <b>GENE</b>  | <b>logFC</b> | <b>logCPM</b> | <b>LR</b> | <b>P-Value</b> | <b>FDR</b> |
|--------------|--------------|---------------|-----------|----------------|------------|
| <i>CRBN</i>  | 0.171523     | 5.979662      | 0.471413  | 0.492338       | 1          |
| <i>CUL4A</i> | -0.02522     | 8.668676      | 0.010878  | 0.916933       | 1          |
| <i>DDB1</i>  | 0.00751      | 6.721533      | 0.001085  | 0.973727       | 1          |
| <i>RBX1</i>  | 0.131598     | 5.346193      | 0.21163   | 0.645493       | 1          |
| <i>IKZF1</i> | -0.3733      | 1.424598      | 0.391919  | 0.531292       | 1          |
| <i>IKZF3</i> | 0            | -1.88007      | 0         | 1              | 1          |

FDR: false discovery rate P-adjusted value

**Table S10. Evolutionary rates and likelihood ratio test for six genes integrating the CRBN complex**

| GENE         | Models M1a vs. M2a |                |            | M8a vs. M8 |                |            |
|--------------|--------------------|----------------|------------|------------|----------------|------------|
|              | $\omega$           | Proportion (p) | LRT        | $\omega$   | Proportion (p) | LRT        |
| <i>CRBN</i>  | < 0.03061          | 0.89589        | $p > 0.99$ | < 0.06875  | 0.858          | $p > 0.99$ |
| <i>CUL4A</i> | < 0.01869          | 0.97541        | $p > 0.99$ | < 0.01869  | 0.897          | $p > 0.71$ |
| <i>DDB1</i>  | < 0.00625          | 0.98907        | $p > 0.99$ | < 0.06770  | 0.999          | $p > 0.88$ |
| <i>RBX1</i>  | < 0.00233          | 0.999          | $p > 0.99$ | < 0.01265  | 0.999          | $p > 0.99$ |
| <i>IKZF1</i> | < 0.04991          | 0.92174        | $p > 0.99$ | < 0.06734  | 0.7            | $p > 0.99$ |
| <i>IKZF3</i> | < 0.05351          | 0.89144        | $p > 0.99$ | < 0.08374  | 0.778          | $p > 0.99$ |

\*Degrees of freedom: 2;

\*\*The omega values and proportions refer to neutral models (M1a and M8a).

**Table S11: Differential Gene Expression of CRL4-CRBN Genes in Mouse Embryonic Stem Cells (mESC) after Thalidomide Exposure**

| <b>24 hours</b> |                                 |                          |                |
|-----------------|---------------------------------|--------------------------|----------------|
| <b>Genes</b>    | <b>Relative Gene Expression</b> |                          | <b>P-Value</b> |
|                 | <b>Saline (n=3)</b>             | <b>Thalidomide (n=3)</b> |                |
| <i>Crbn</i>     | 8.27009                         | 7.916073                 | 0.0759         |
| <i>Ddb1</i>     | 10.49194                        | 10.63323                 | 0.0721         |
| <i>Cul4a</i>    | 8.365498                        | 8.043906                 | <b>0.0068</b>  |
| <i>Rbx1</i>     | 9.610183                        | 9.382166                 | 0.0635         |
| <i>Ikzf1</i>    | 5.114148                        | 5.095873                 | 0.6359         |
| <i>Ikzf3</i>    | 4.790702                        | 5.112851                 | 0.2            |

  

| <b>48 hours</b> |                                 |                          |                |
|-----------------|---------------------------------|--------------------------|----------------|
| <b>Genes</b>    | <b>Relative Gene Expression</b> |                          | <b>P-Value</b> |
|                 | <b>Saline (n=3)</b>             | <b>Thalidomide (n=3)</b> |                |
| <i>Crbn</i>     | 8.236536                        | 7.879079                 | <b>0.0244</b>  |
| <i>Ddb1</i>     | 10.6935                         | 10.84967                 | <b>0.0365</b>  |
| <i>Cul4a</i>    | 8.26444                         | 7.942627                 | <b>0.0195</b>  |
| <i>Rbx1</i>     | 9.580732                        | 9.28862                  | <b>0.0117</b>  |
| <i>Ikzf1</i>    | 4.27323                         | 4.375998                 | 0.3252         |
| <i>Ikzf3</i>    | 4.439432                        | 4.528063                 | 0.3261         |

  

| <b>72 hours</b> |                                 |                          |                |
|-----------------|---------------------------------|--------------------------|----------------|
| <b>Genes</b>    | <b>Relative Gene Expression</b> |                          | <b>P-Value</b> |
|                 | <b>Saline (n=3)</b>             | <b>Thalidomide (n=3)</b> |                |
| <i>Crbn</i>     | 8.444035                        | 8.342036                 | 0.217          |
| <i>Ddb1</i>     | 10.92195                        | 10.9002                  | 0.4821         |
| <i>Cul4a</i>    | 8.641674                        | 8.552191                 | 0.0781         |
| <i>Rbx1</i>     | 9.90335                         | 9.857822                 | 0.5563         |
| <i>Ikzf1</i>    | 4.534075                        | 4.768691                 | 0.256          |
| <i>Ikzf3</i>    | 4.79187                         | 4.917498                 | 0.3067         |

**Table S12: Differential Gene Expression of CRL4-CRBN Genes in Monkey Embryos after Thalidomide Exposure**

| <b>6 hours</b> |                                 |                          |                |
|----------------|---------------------------------|--------------------------|----------------|
| <b>Genes</b>   | <b>Relative Gene Expression</b> |                          | <b>P-Value</b> |
|                | <b>Control (n=2)</b>            | <b>Thalidomide (n=3)</b> |                |
| <i>Crbn</i>    | 7.968                           | 7.76                     | 0.3532         |
| <i>Ddb1</i>    | 9.253                           | 9.403                    | 0.4            |
| <i>Cul4a</i>   | 7.302                           | 6.529                    | <b>0.0121</b>  |
| <i>Rbx1</i>    | 10.924                          | 10.9                     | 1              |
| <i>Ikzf1</i>   | 3.302                           | 3.331                    | 0.9024         |
| <i>Ikzf3</i>   | 3.781                           | 3.752                    | 1              |

**Table S13. Differential Gene Expression of CRL4-CRBN Genes in Human Progenitor Stem Cells, 2 and 6 Days after Exposure**

| GENE         | 2 Days After Exposure |          |          |          |          | 6 Days After Exposure |          |          |          |          |
|--------------|-----------------------|----------|----------|----------|----------|-----------------------|----------|----------|----------|----------|
|              | logFC                 | logCPM   | LR       | P-Value  | FDR      | logFC                 | logCPM   | LR       | P-Value  | FDR      |
| <i>CRBN</i>  | 0.181874              | 5.644369 | 1.351001 | 0.245103 | 0.707643 | 0.181874              | 5.644369 | 1.351001 | 0.245103 | 0.707643 |
| <i>CUL4A</i> | -0.03389              | 8.286705 | 0.122679 | 0.726147 | 1        | -0.03389              | 8.286705 | 0.122679 | 0.726147 | 1        |
| <i>DDB1</i>  | 0.092972              | 6.692616 | 0.459681 | 0.497773 | 0.973657 | 0.092972              | 6.692616 | 0.459681 | 0.497773 | 0.973657 |
| <i>RBX1</i>  | -0.18149              | 5.930839 | 2.033754 | 0.15384  | 0.583658 | -0.18149              | 5.930839 | 2.033754 | 0.15384  | 0.583658 |
| <i>IKZF1</i> | -0.82007              | 1.202056 | 1.78253  | 0.181839 | 0.642126 | -0.82007              | 1.202056 | 1.78253  | 0.181839 | 0.642126 |
| <i>IKZF3</i> | 0                     | -1.20123 | 0        | 1        | 1        | 0                     | -1.20123 | 0        | 1        | 1        |

FDR: false discovery rate P-adjusted value



## **Supplementary Figures 1-14**

### **CRL4-CEREBLON COMPLEX IN THALIDOMIDE EMBRYOPATHY: A TRANSLATIONAL INVESTIGATION**

Thayne Woycinck Kowalski

Julia do Amaral Gomes

Gabriela Barreto Caldas Garcia

Lucas Rosa Fraga

Vanessa Rodrigues Paixao-Cortes

Mariana Recamonde-Mendoza

Maria Teresa Vieira Sanseverino

Lavinia Schuler-Faccini

Fernanda Sales Luiz Vianna





### Figure S3: *IKZF1* variants in the TE subjects

Number of variants in the *IKZF1* gene in each subject with TE, and their respective location in the gene; Genotypes of the *IKZF1* variants in each subject.

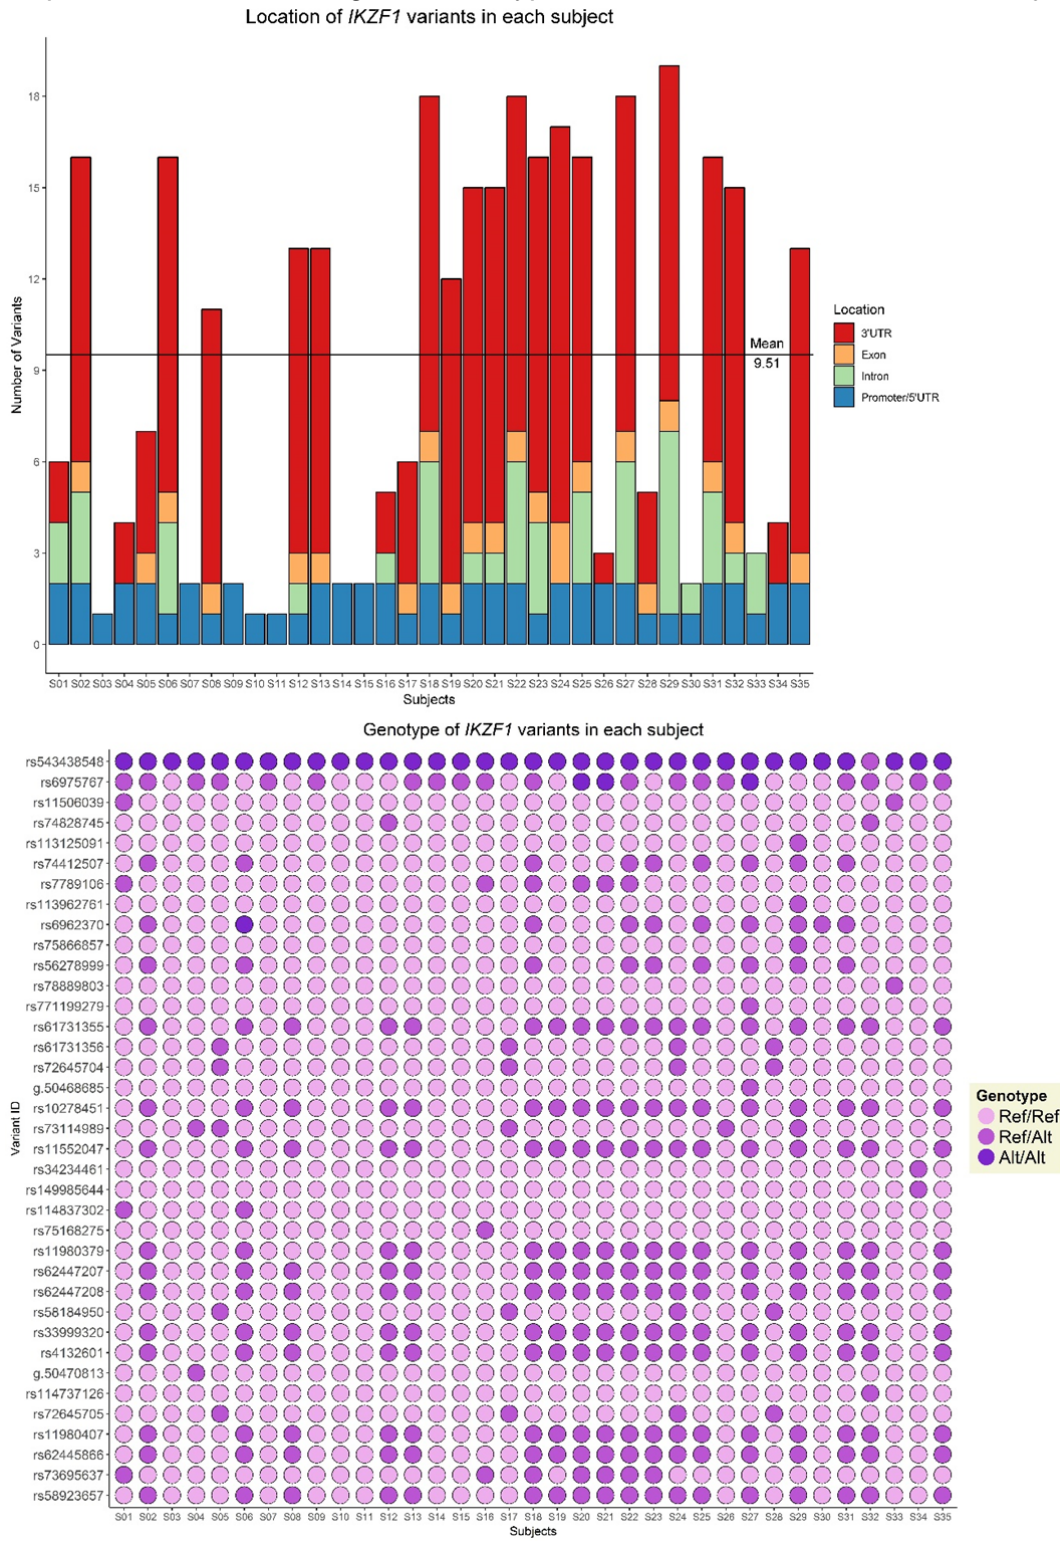

### Figure S4: *IKZF3* variants in the TE subjects

Number of variants in the *IKZF3* gene in each subject with TE, and their respective location in the gene; Genotypes of the *IKZF3* variants in each subject.

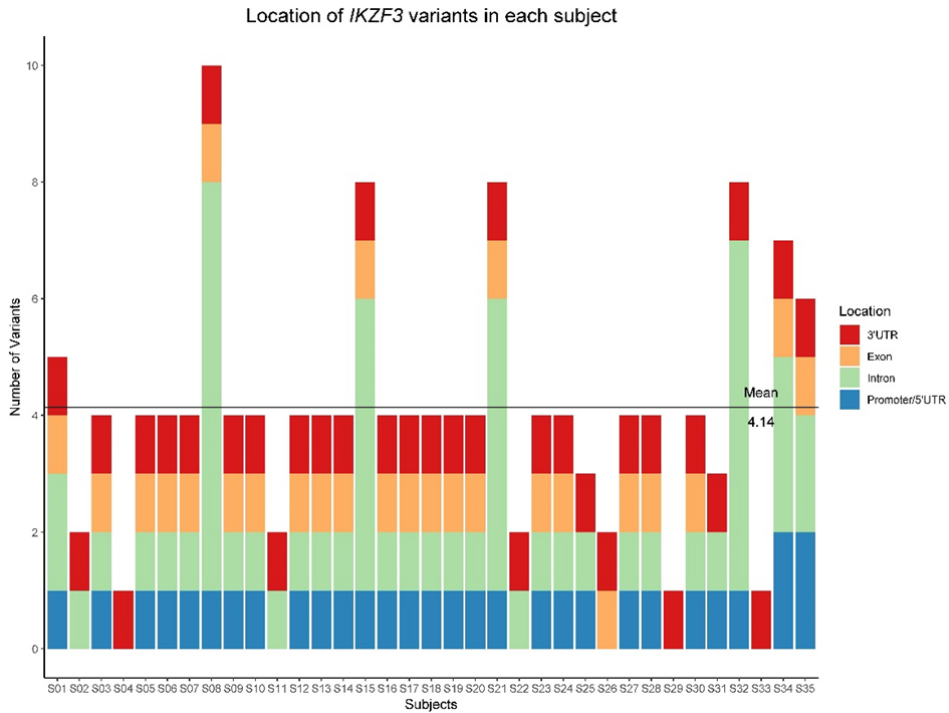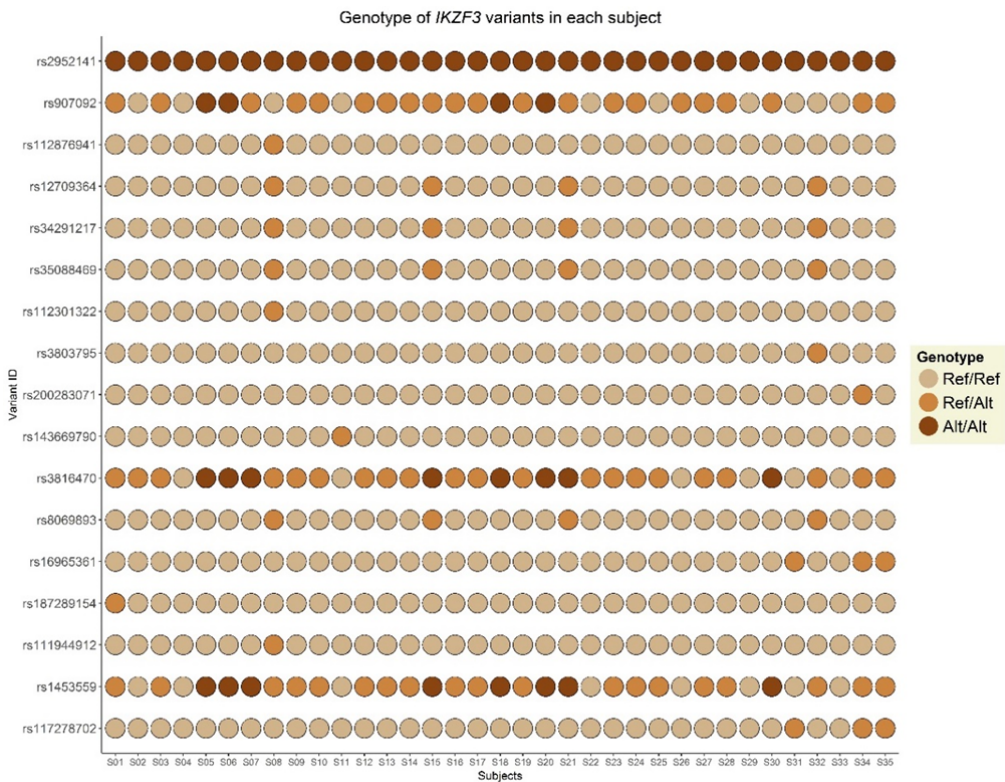

**Figure S5: Heatmap of *CRBN* variants**

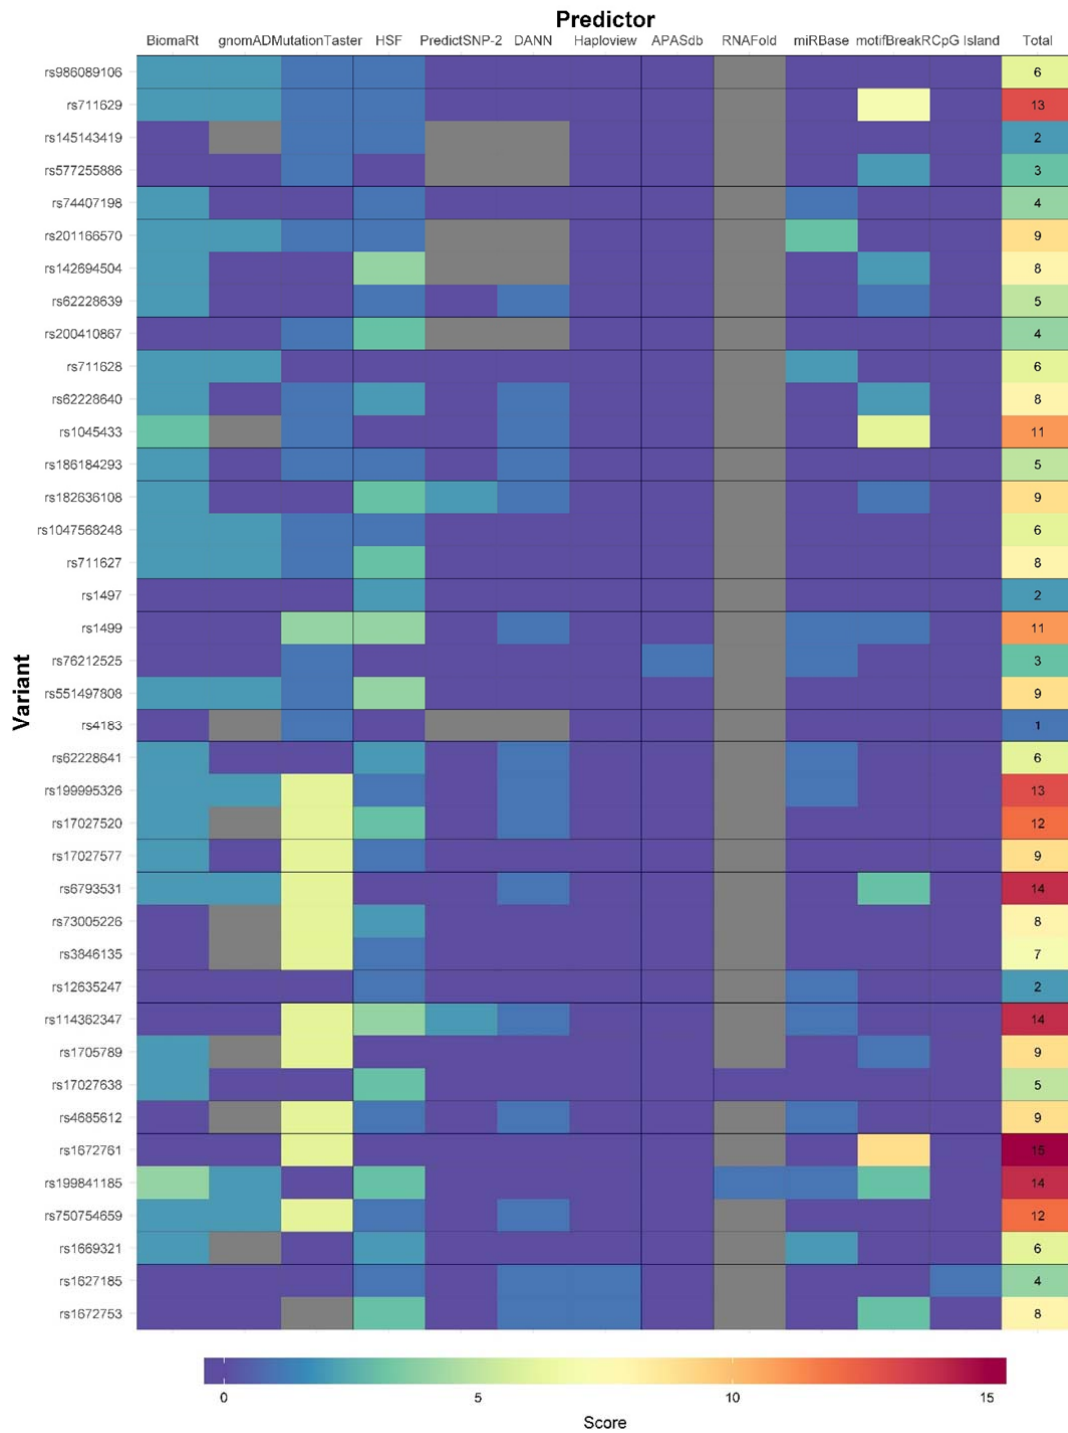

**Figure S6: Heatmap of *CUL4A* variants**

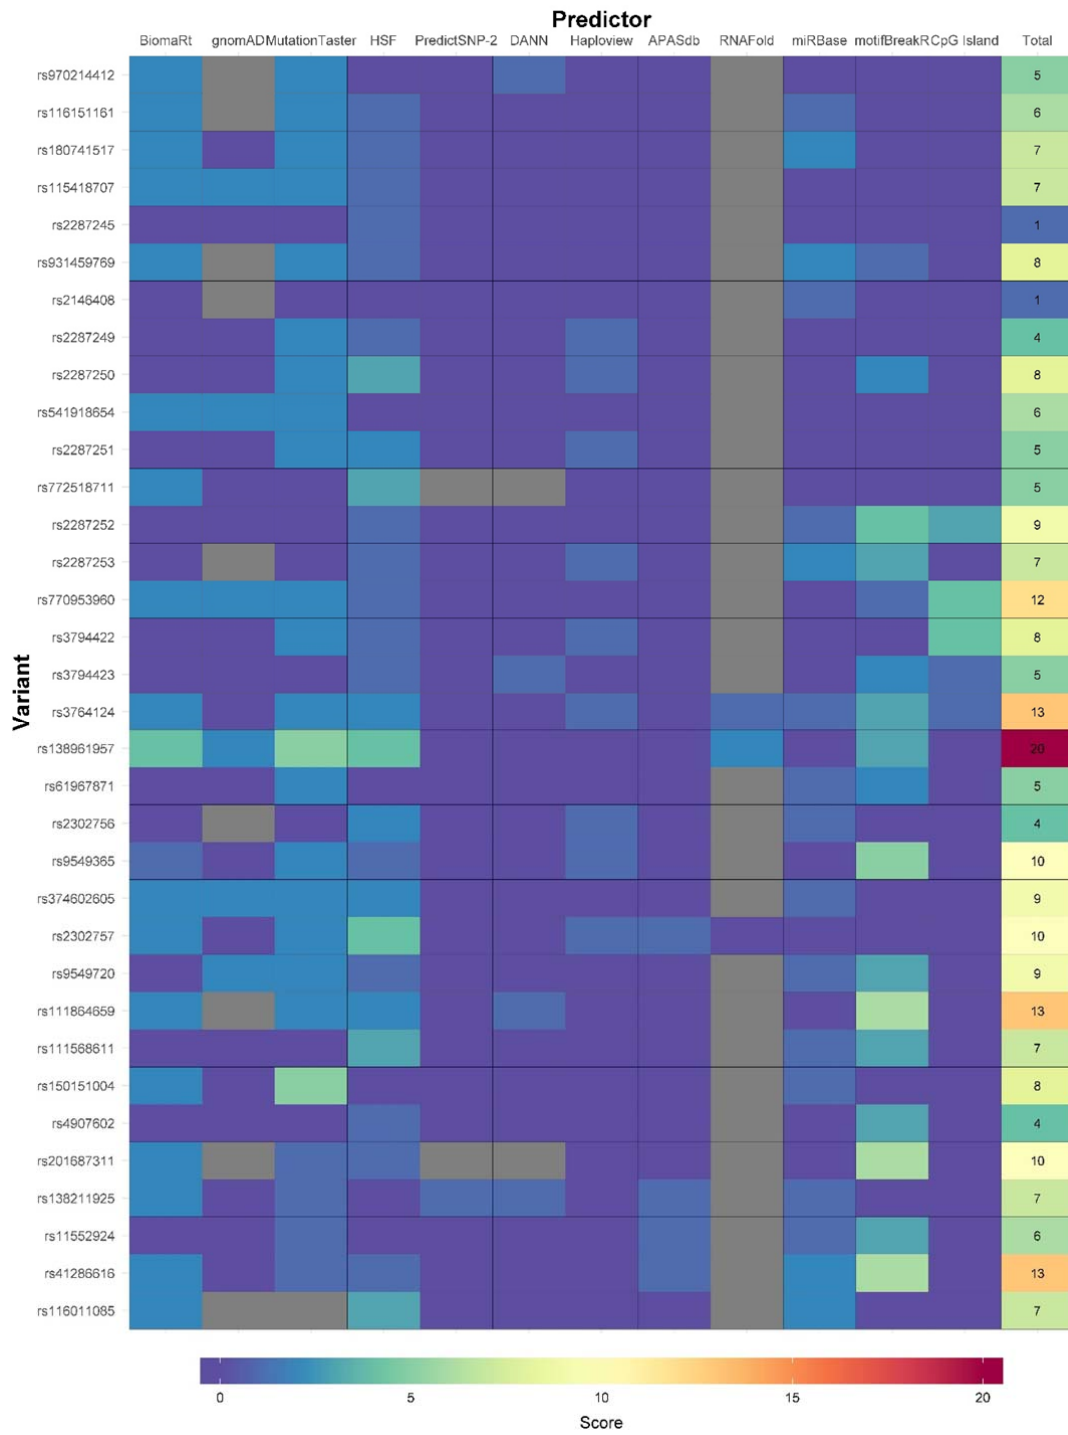

**Figure S7: Heatmap of *DDB1* variants**

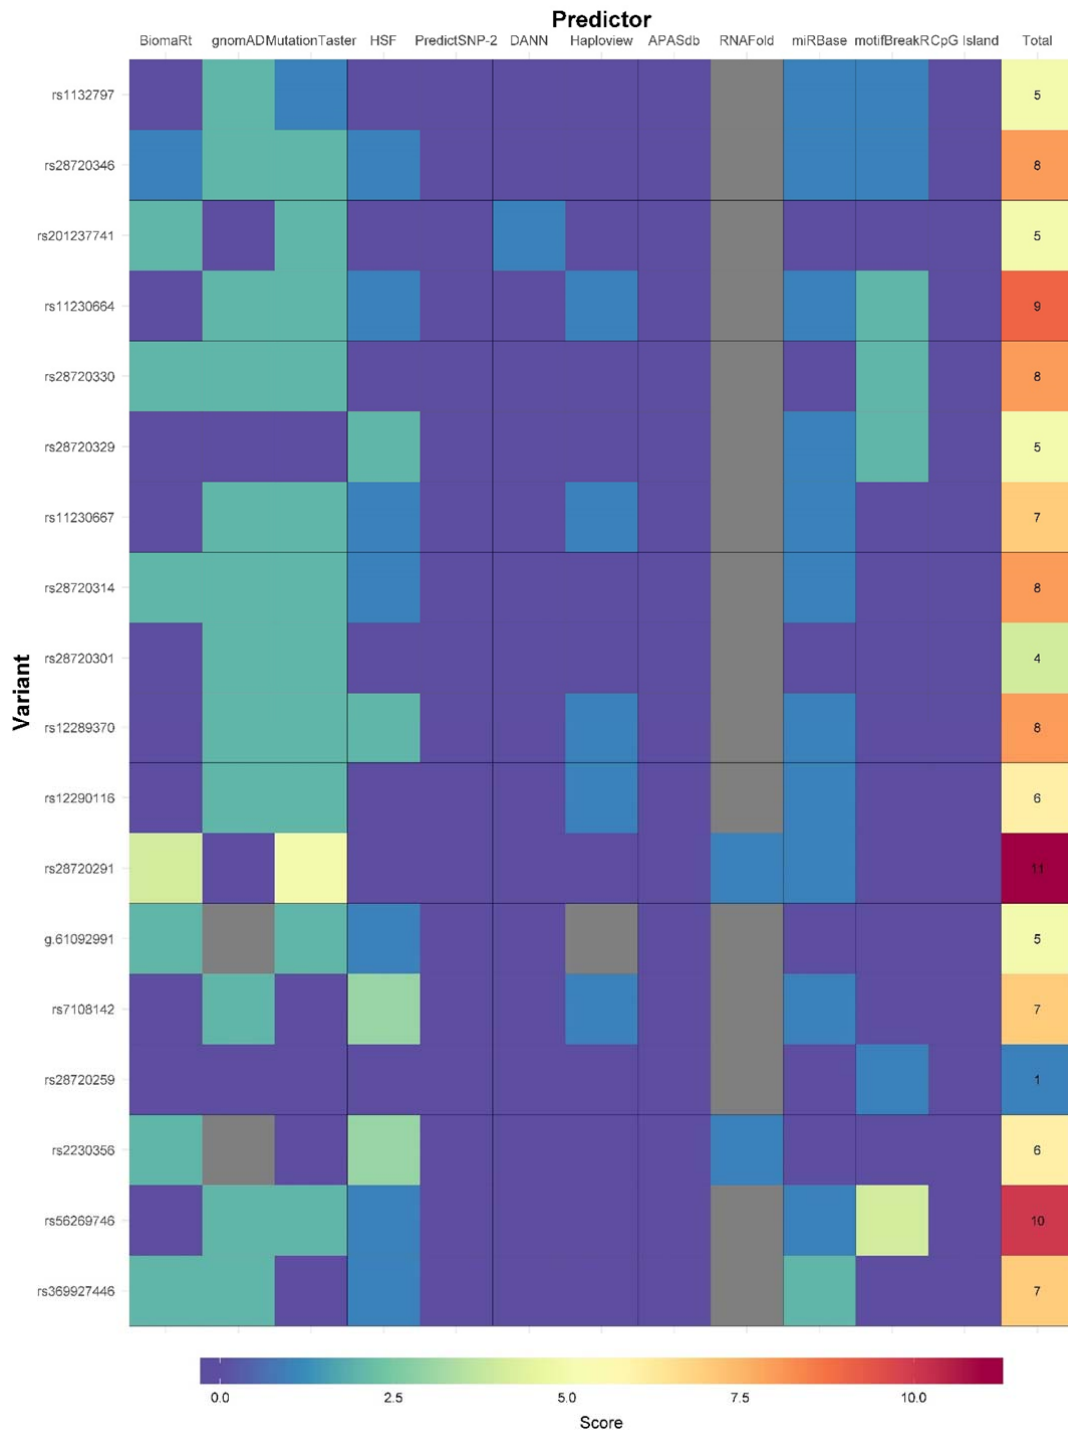



**Figure S8: Heatmap of *IKZF1* variants**

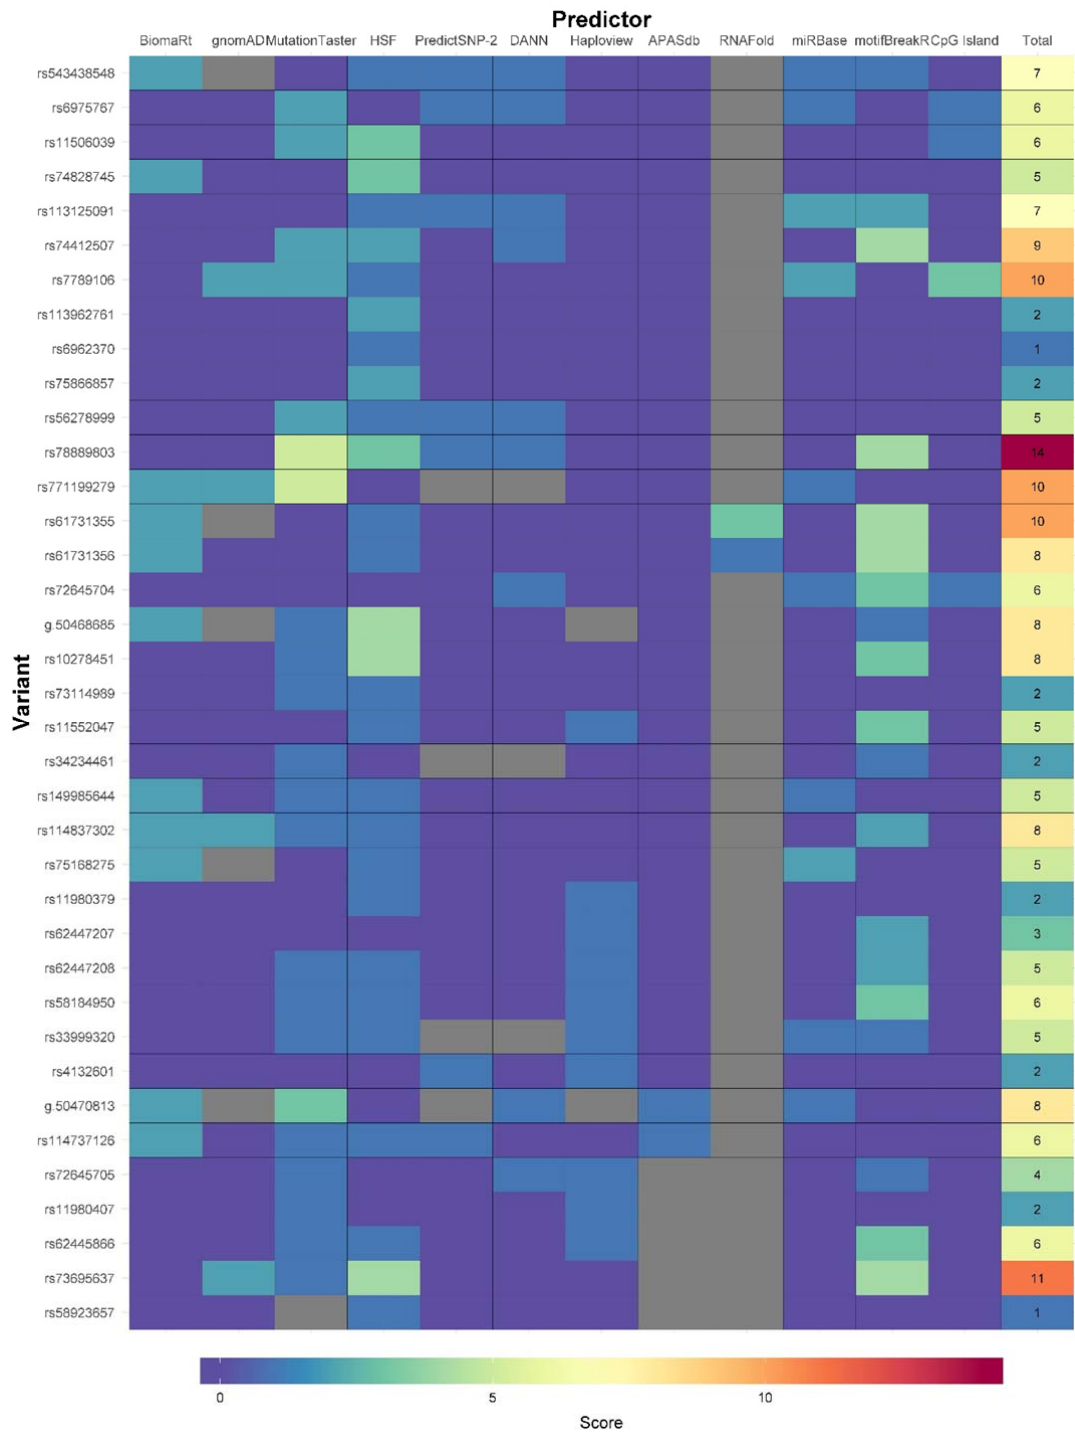

**Figure S9: Heatmap of *IKZF3* variants**

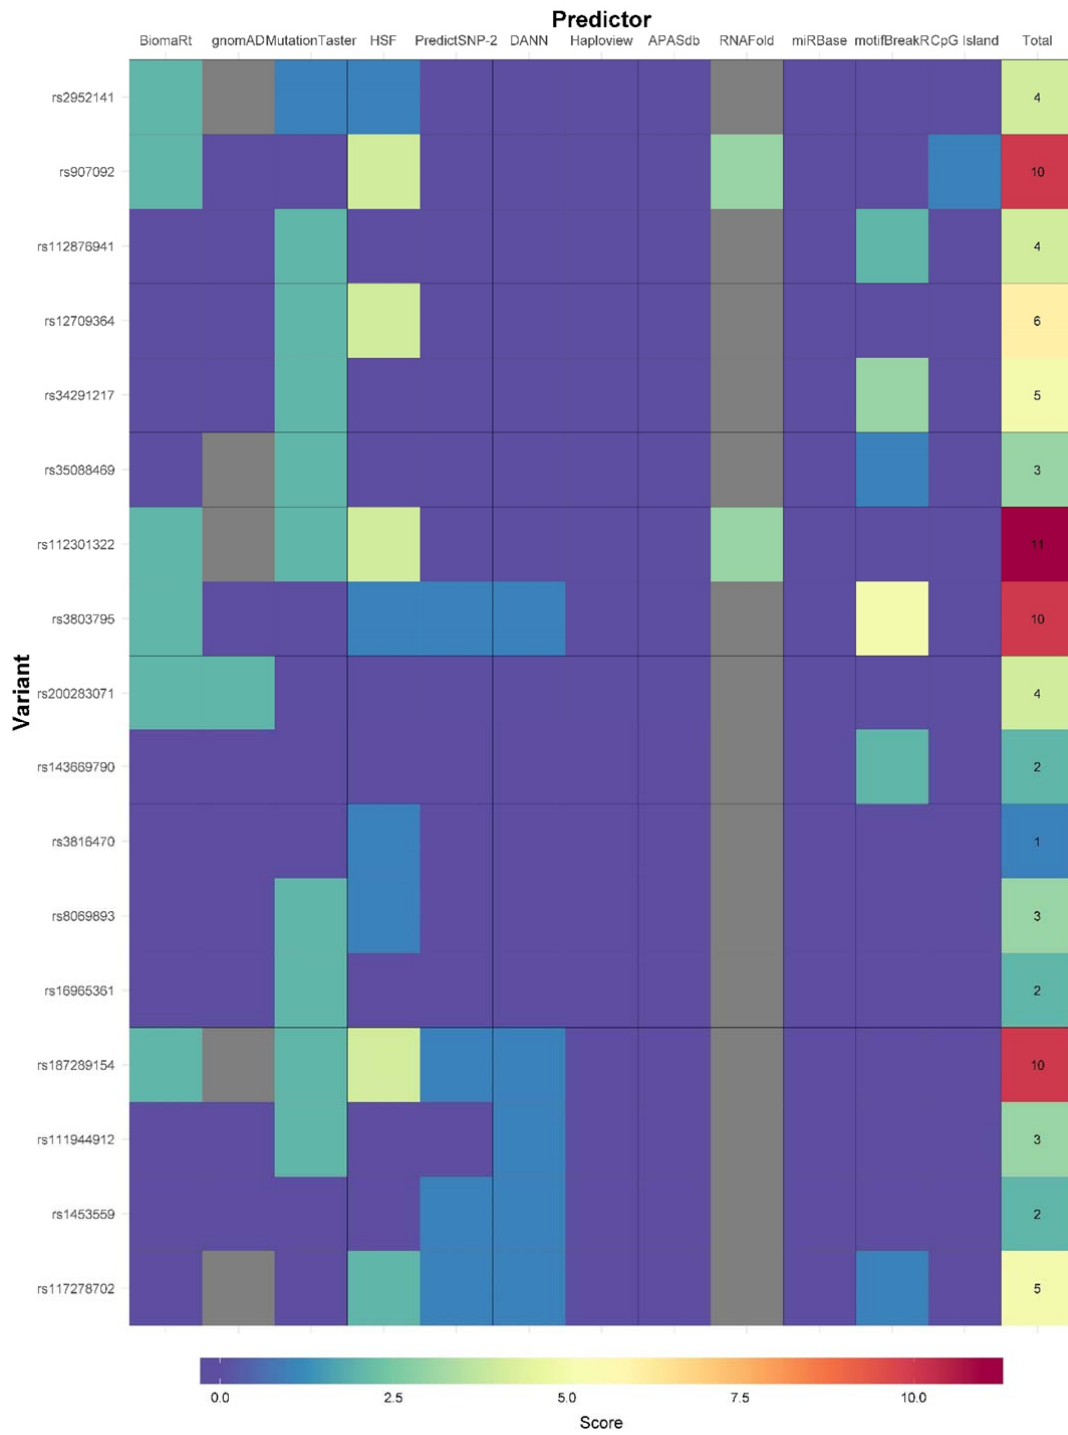

**Figure S10:** Structural changes in *CUL4A* and *IKZF1* mRNAs because of rs138961957 and rs61731355 synonymous variants, respectively.

**CUL4A**

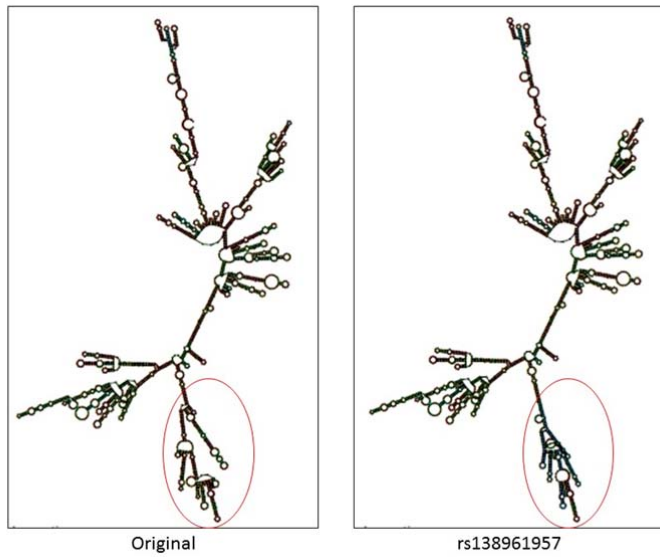

**IKZF1**

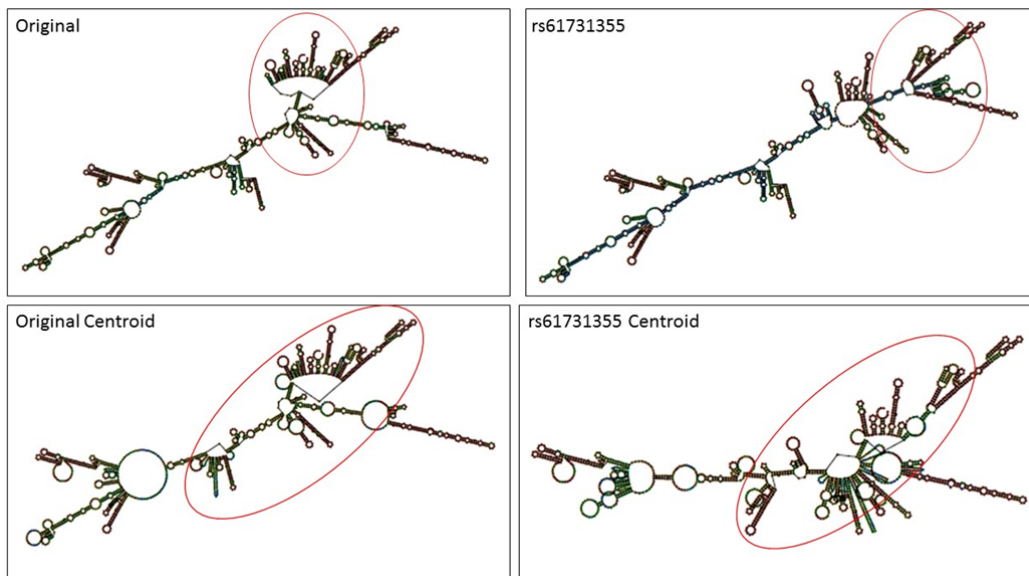

**Figure S11:** Representation of the location of each variant identified in the gene panel

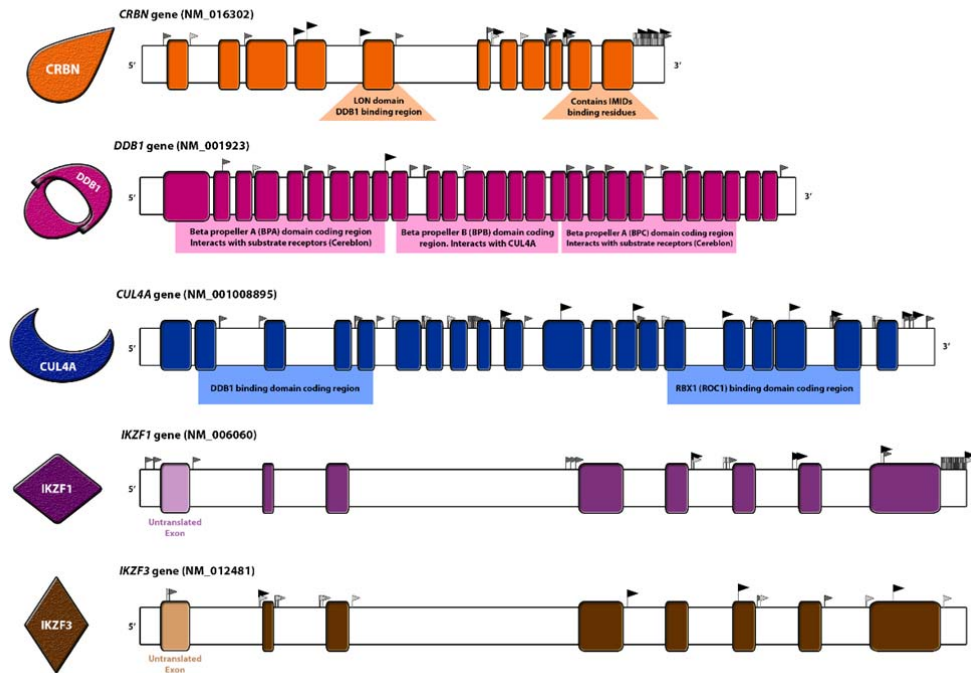

Flags represent the location of each variant. Light gray flags: variants of low score. Medium gray flags: variants of medium score. Black flags: variants of high score.

**Figure S12:** Gene expression in transcripts per million for limb development,  $CRL4^{CRBN}$  complex and reference genes.

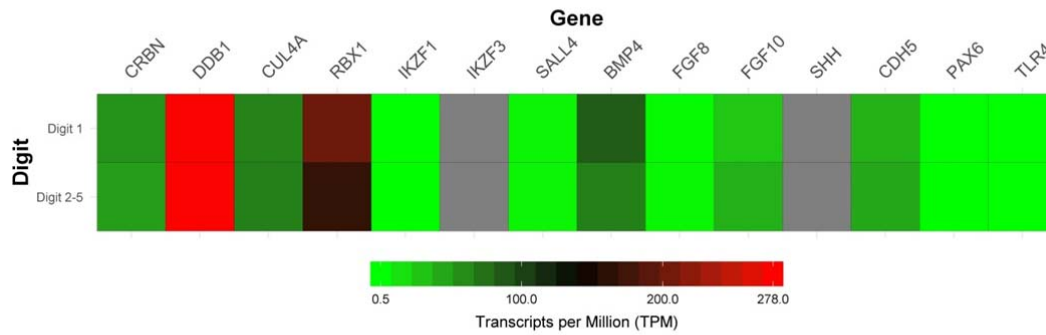

*Legend:* green colors: low expression; black: medium expression; red: high expression. Genes evaluated: *CRBN*, *DDB1*, *CUL4A*, *RBX1*, *IKZF1*, *IKZF3*, *SALL4*, *BMP4*, *FGF8*, *FGF10*, *SHH*, *CDH5*, *PAX6*, and *TLR4*.

**Figure S13:** *CRBN* gene methylation analyses in the TE sample

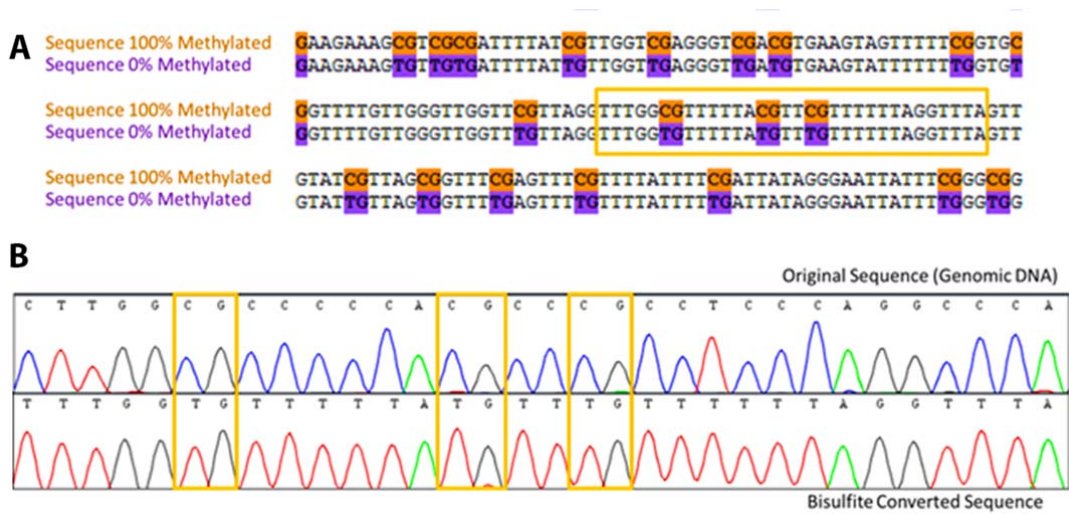

(A) DNA sequence after bisulfite conversion. Orange: nucleotides that would be encountered in total methylation. Purple: nucleotides that would be encountered in the absence of methylation. (B) Sanger sequencing. Yellow boxes mark CpG dinucleotides, with no methylation.

**Figure S14:** Pathways enriched in the CRL4 complex interacting proteins

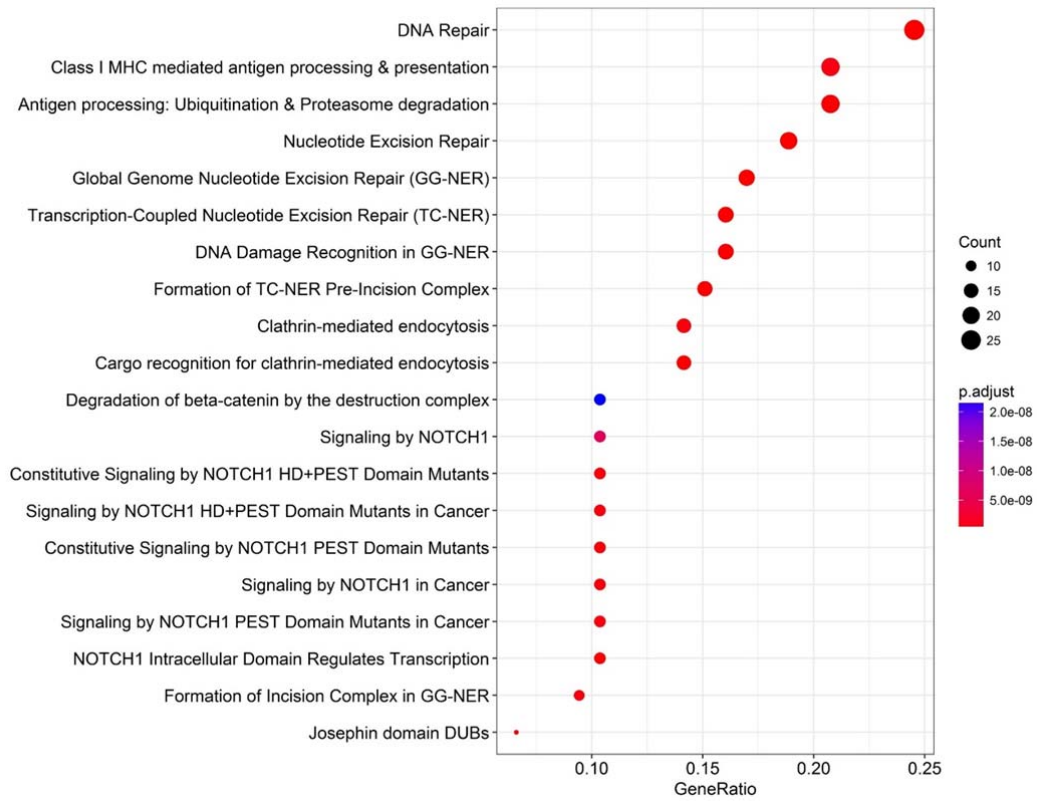

## **Supplementary Files 1 and 2**

### **CRL4-CEREBLON COMPLEX IN THALIDOMIDE EMBRYOPATHY: A TRANSLATIONAL INVESTIGATION**

Thayne Woycinck Kowalski

Julia do Amaral Gomes

Gabriela Barreto Caldas Garcia

Lucas Rosa Fraga

Vanessa Rodrigues Paixao-Cortes

Mariana Recamonde-Mendoza

Maria Teresa Vieira Sanseverino

Lavinia Schuler-Faccini

Fernanda Sales Luiz Vianna



# Supplementary File

Alignment of *CRBN*, *DDB1* and *CUL4A* genes and proteins in eight species

Source: UNIPROT

# CRBN

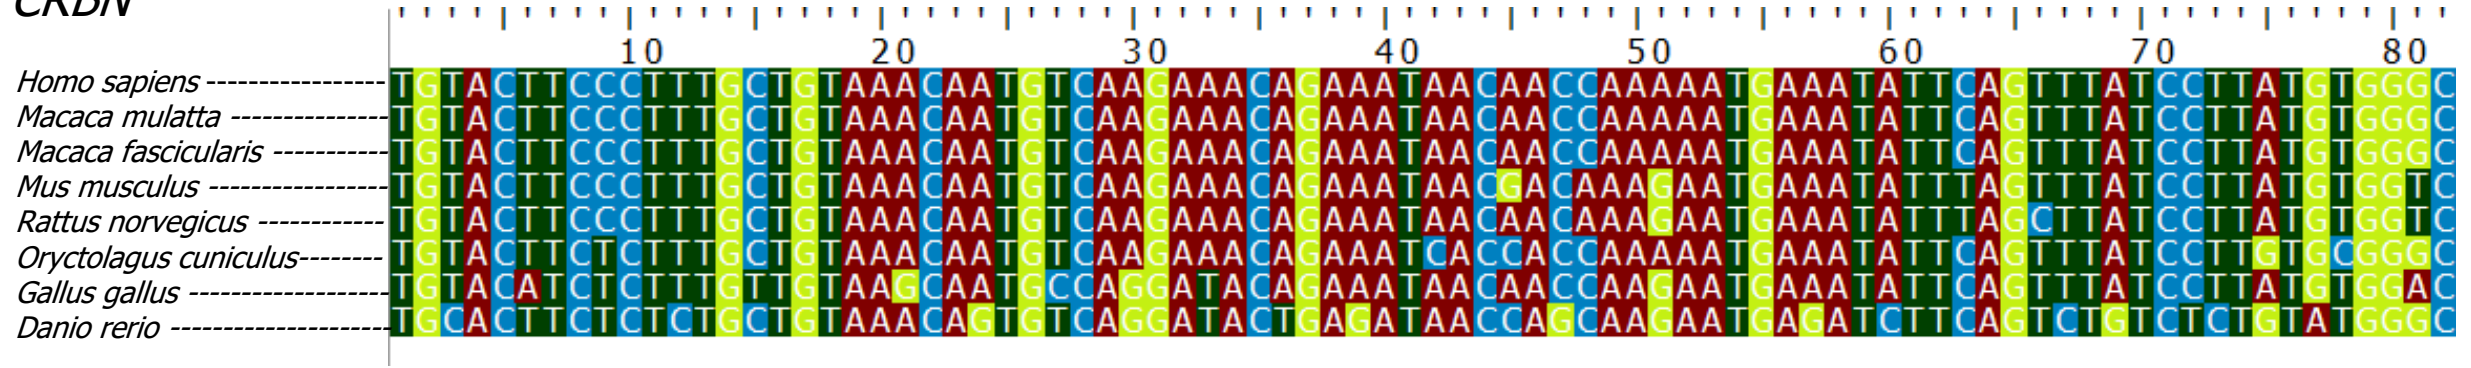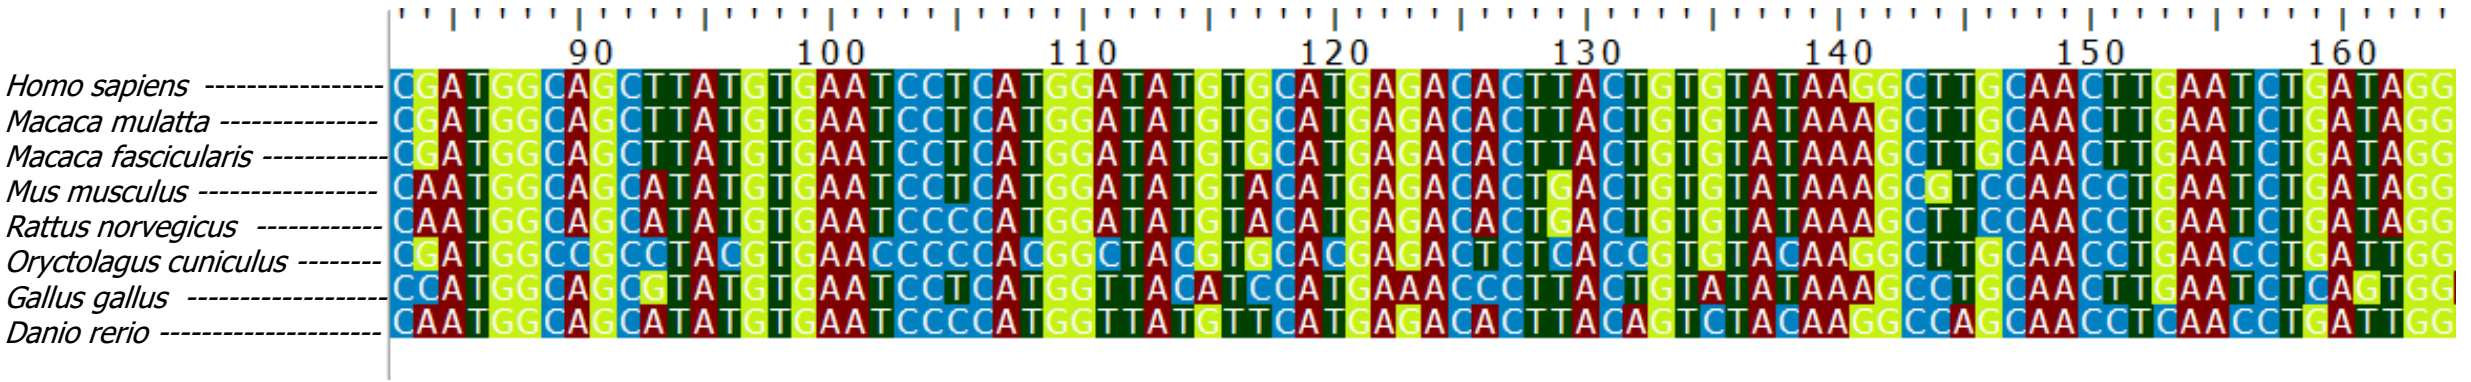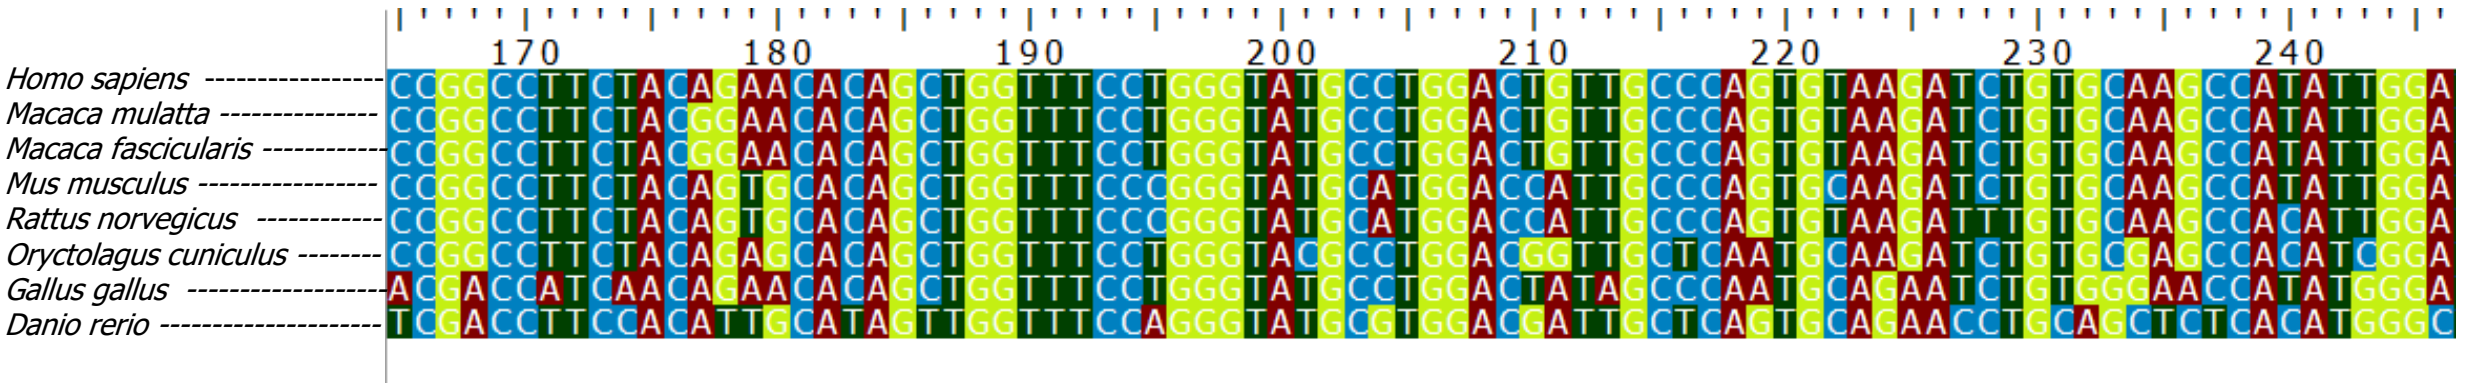

# CRBN

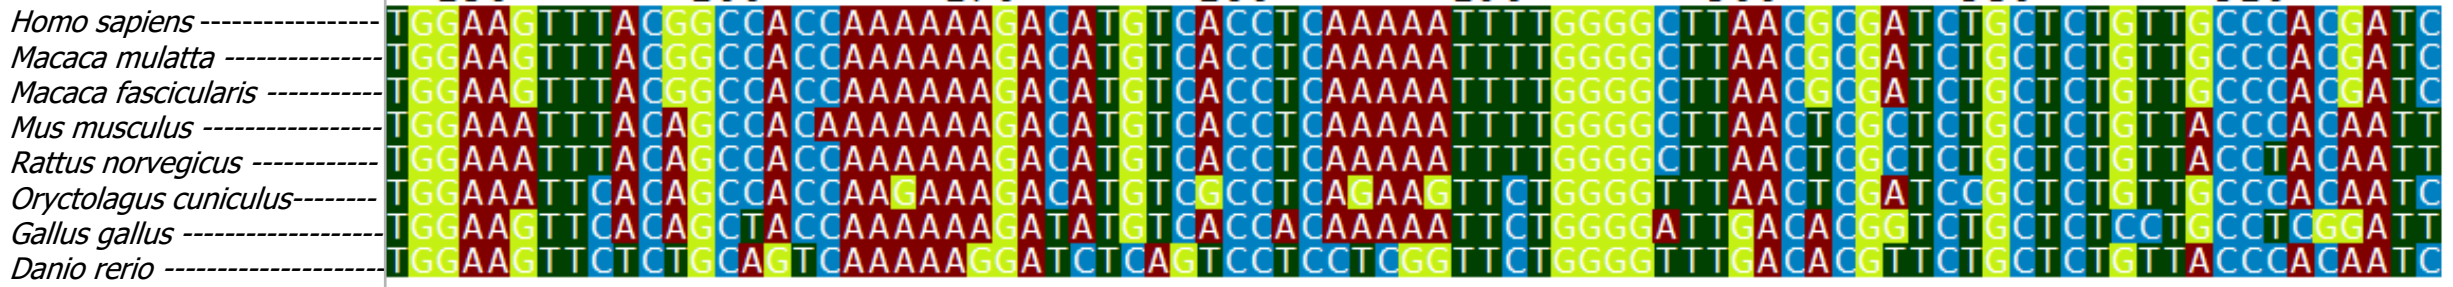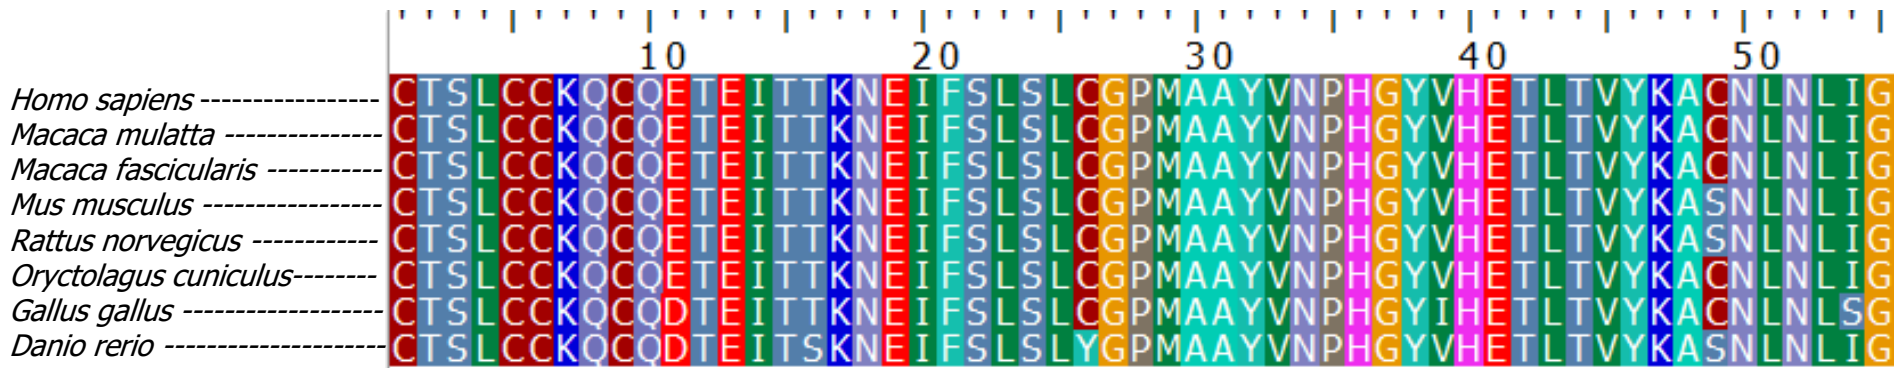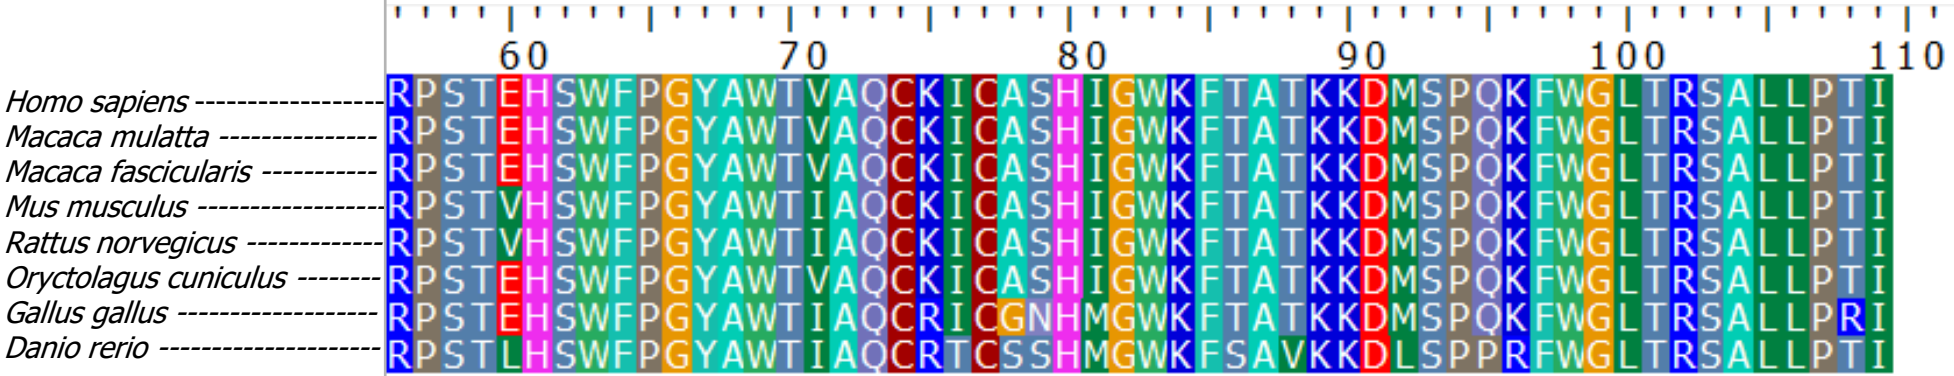

CRBN gene - the well conserved CULT domain (318-426), DNA and protein sequences.

\*Source: UniProt

# DDB1

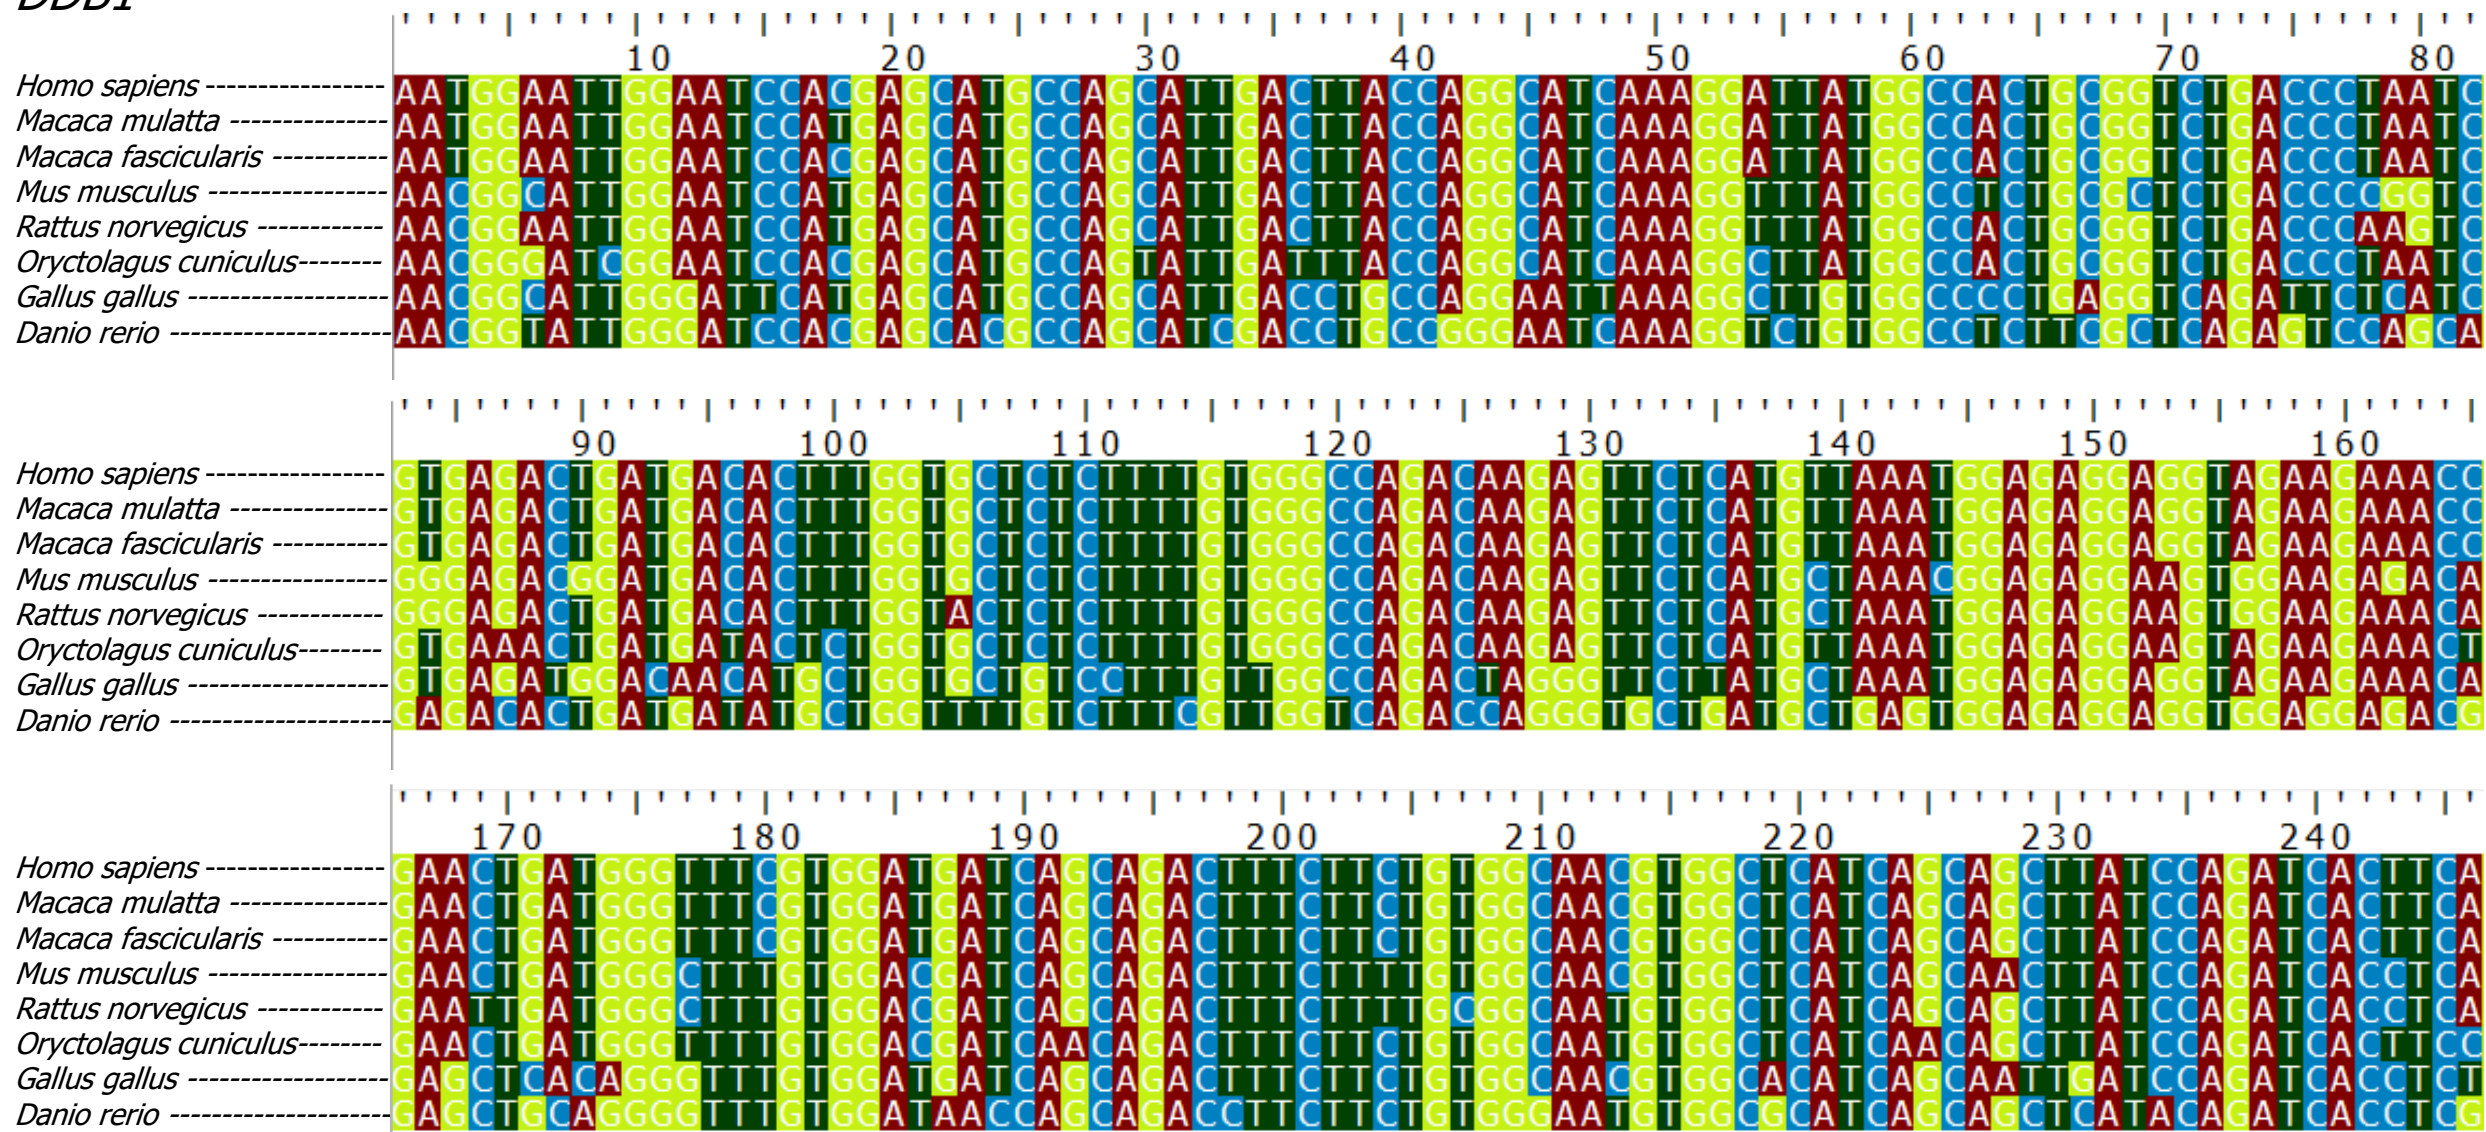

## DDB1

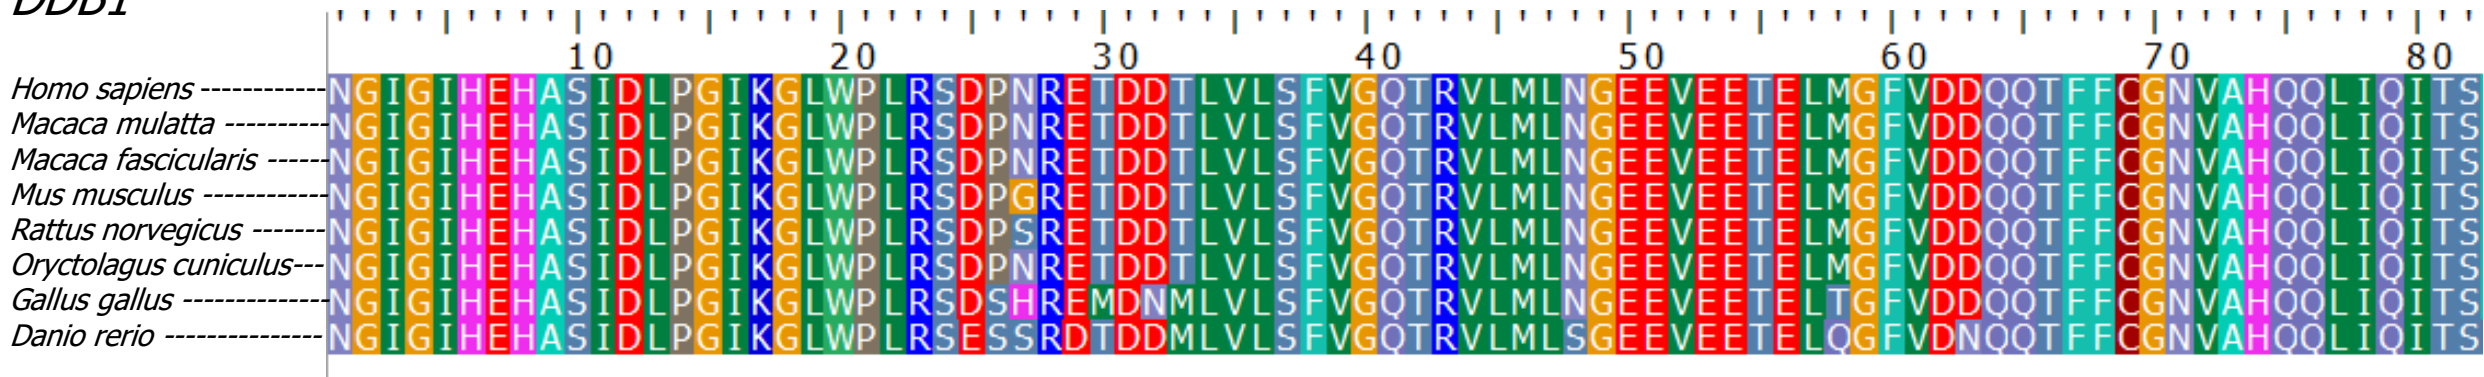

*DDB1* gene: first 246 nucleotides and their 82 corresponding amino acids from the WD repeat beta-propeller B; Interaction with CUL4A region. Only some of the amino acids (392-473) are shown. The full region has 317 amino acids (392-708).

\*Source: UniProt

# CUL4A

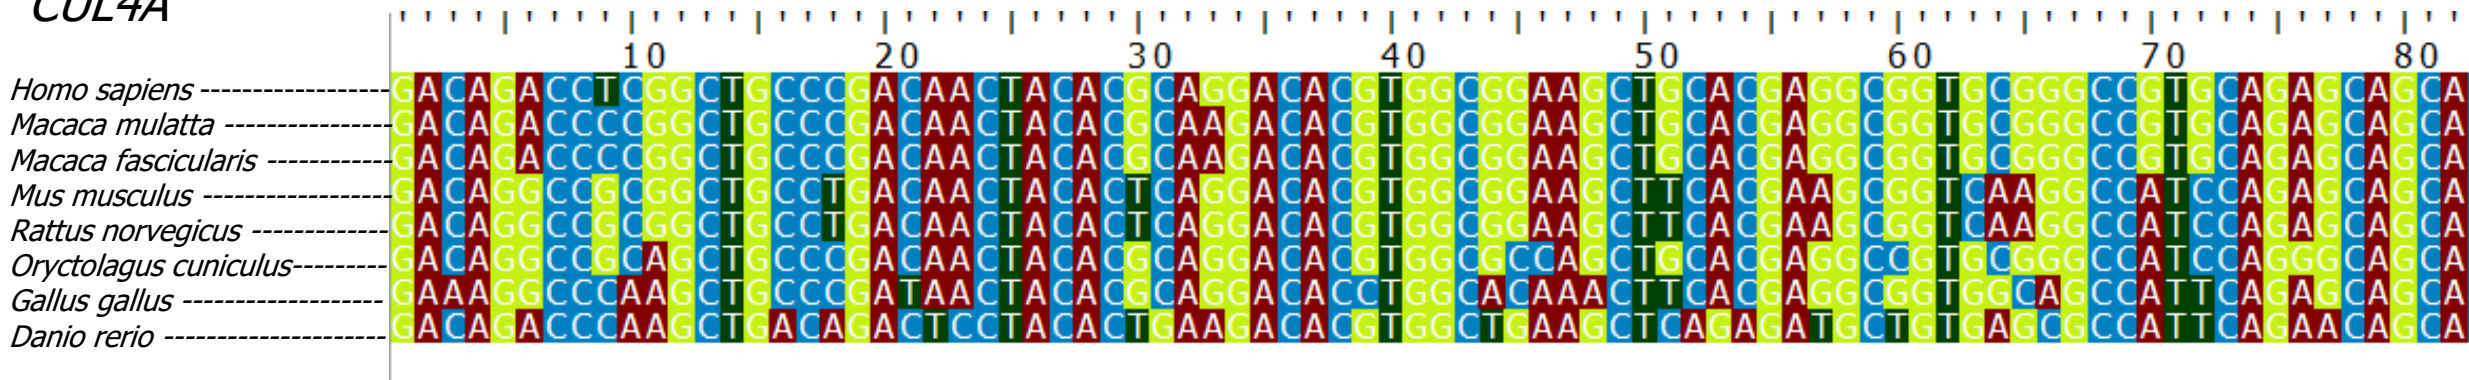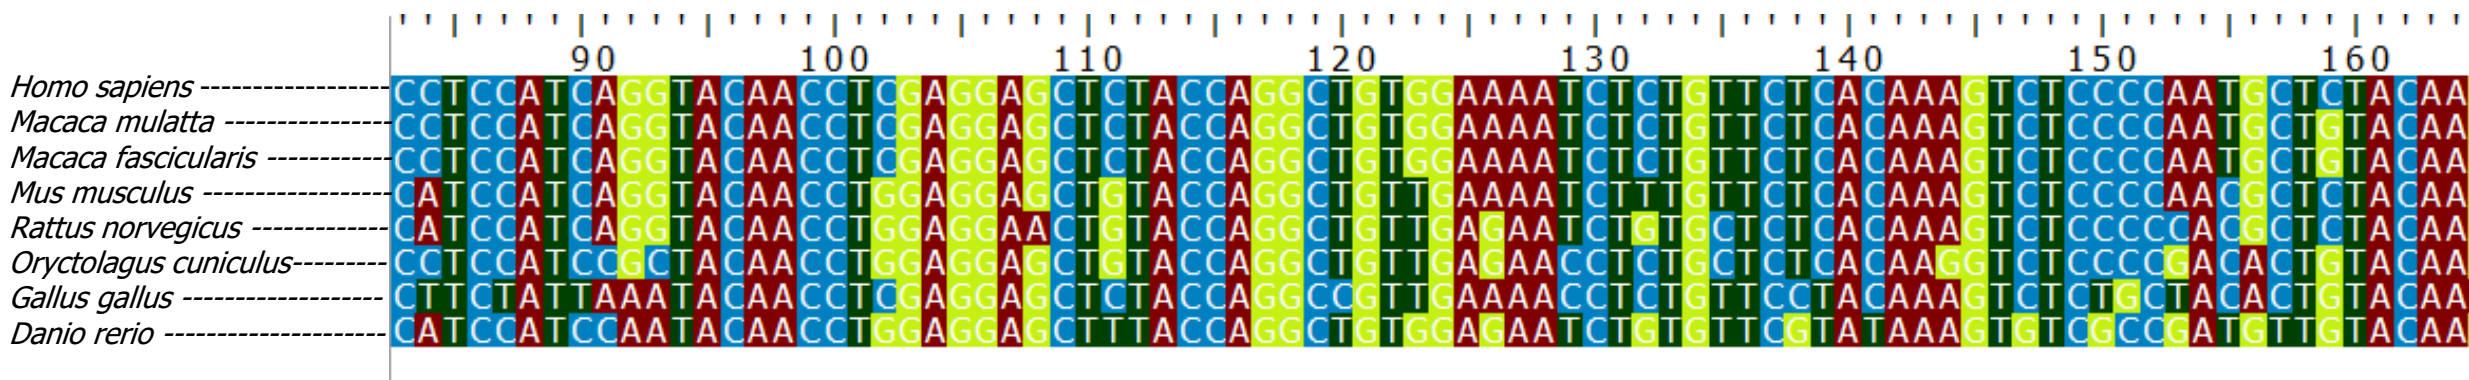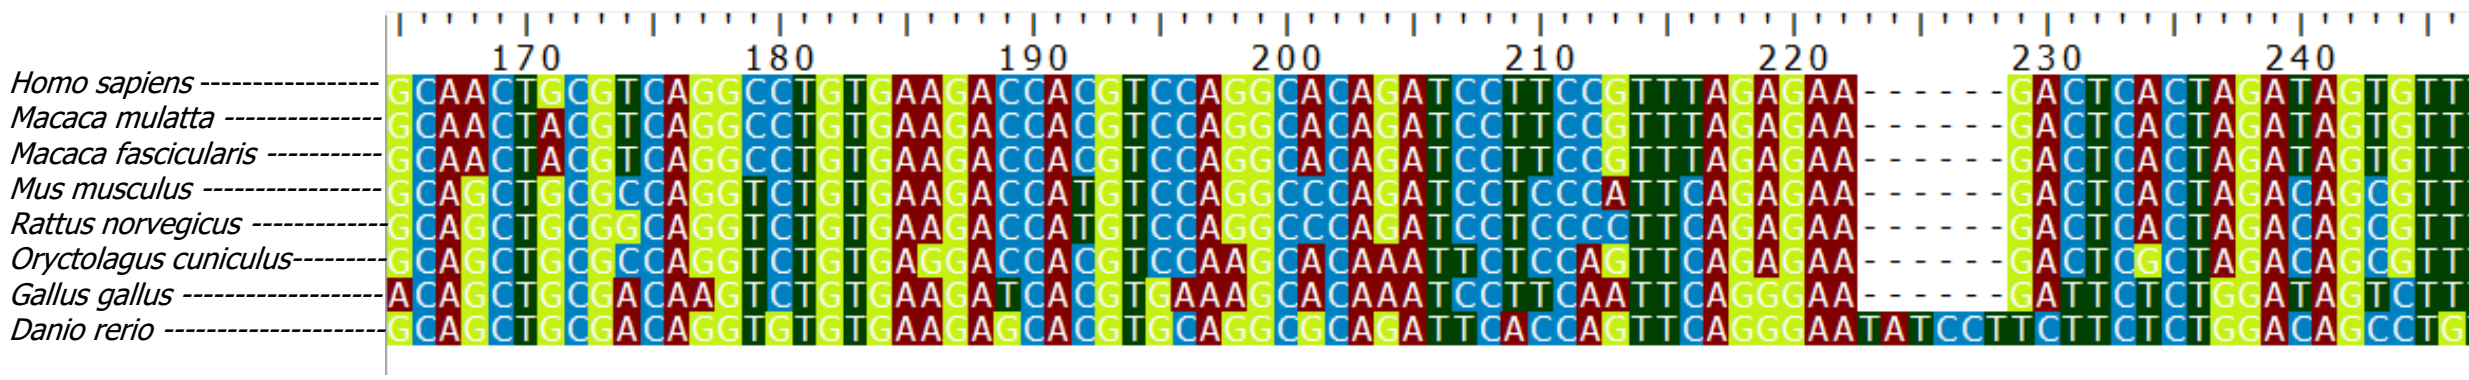

# CUL4A

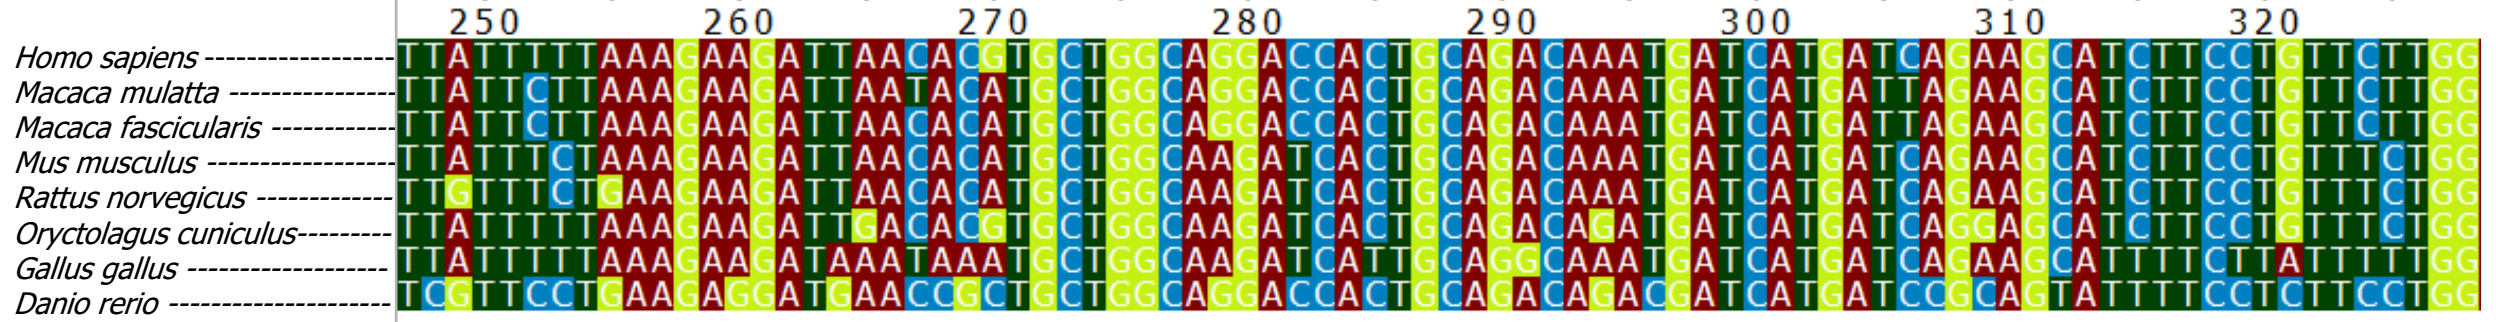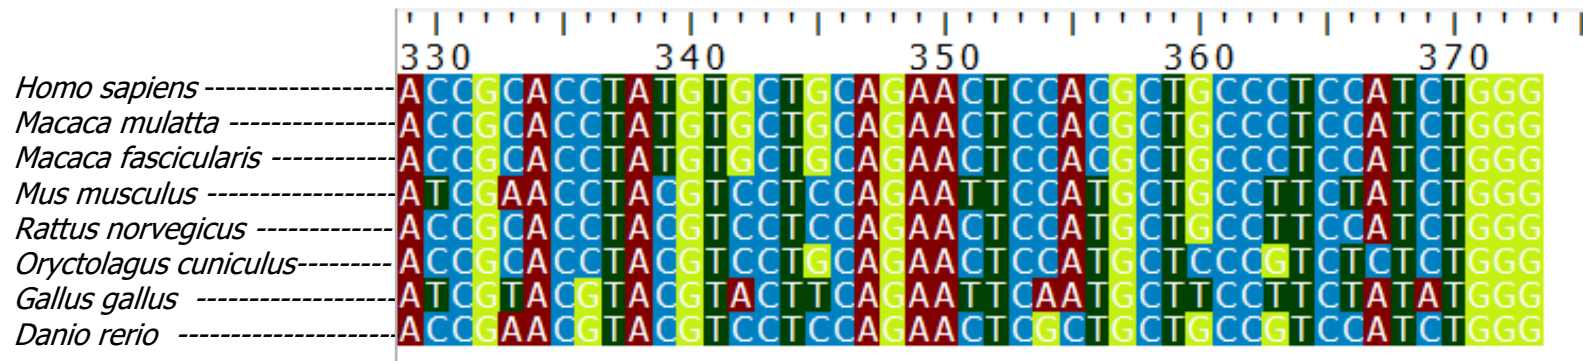

# CUL4A

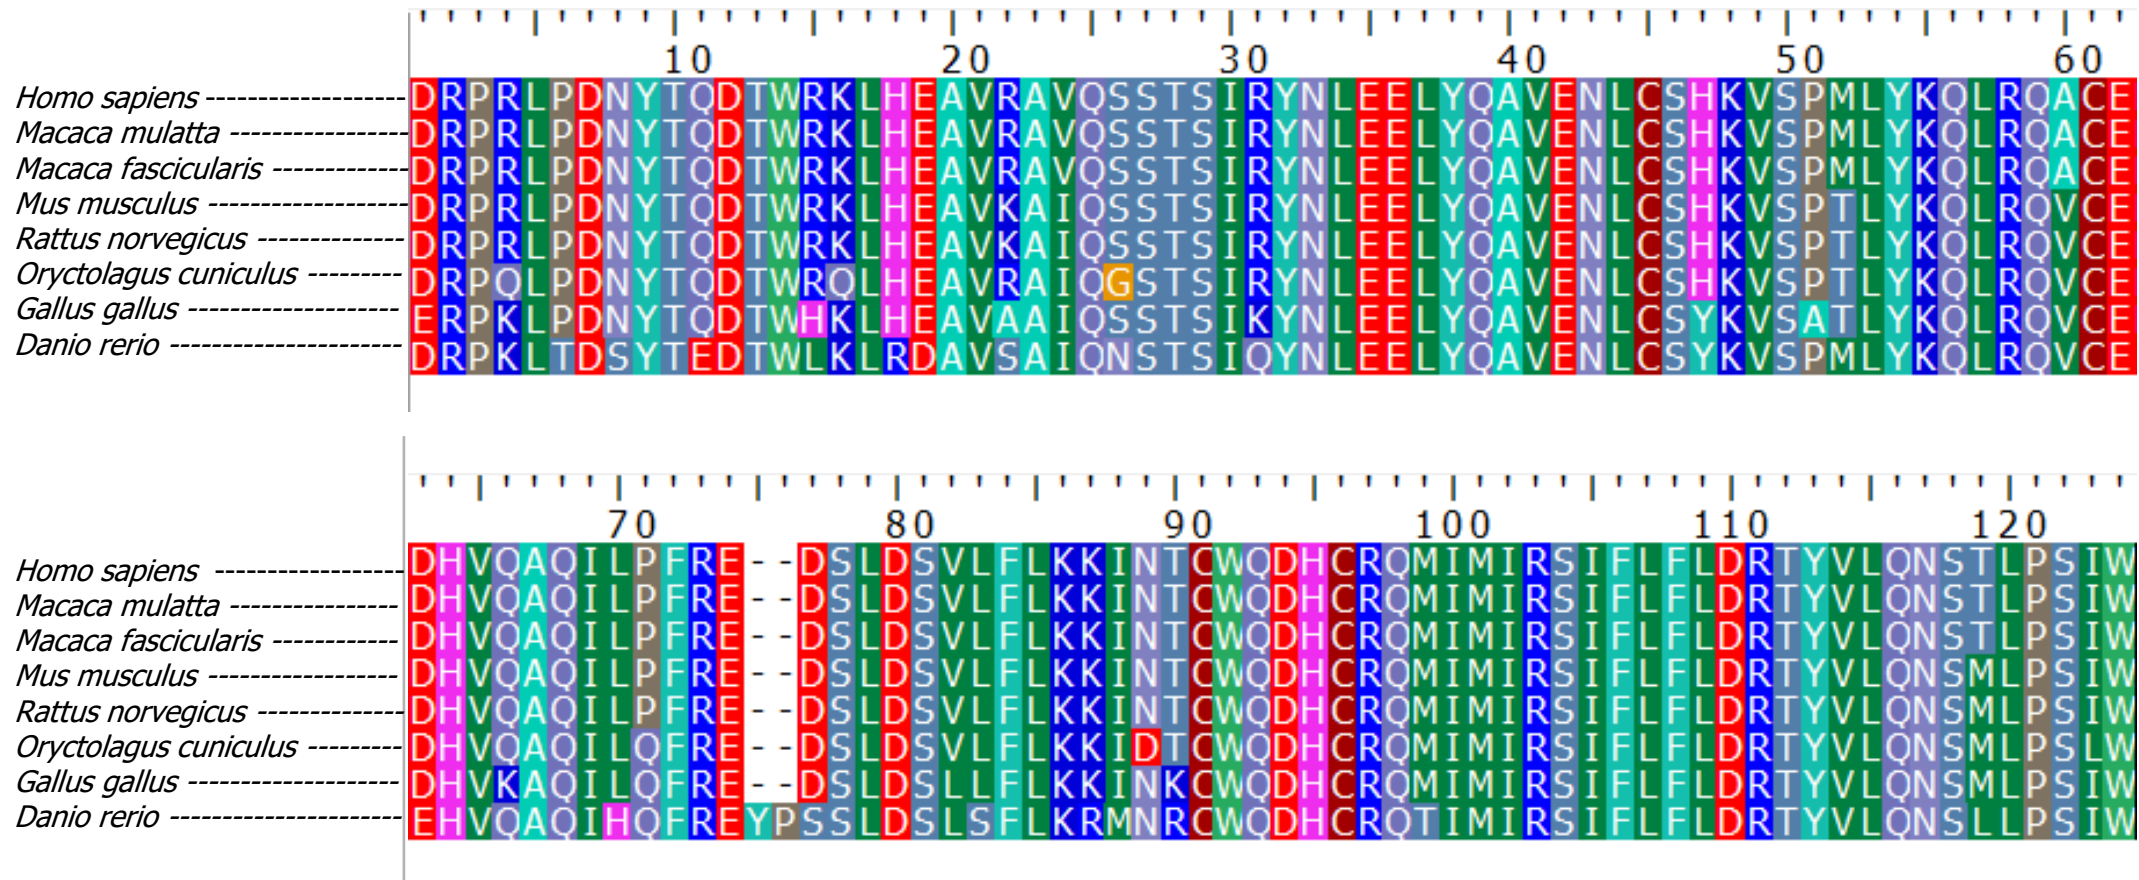

CUL4A gene – Exons 2, 3, 4, and 5 (DNA sequence) and their respective amino acids.



Supplemental File 2: Codon usage for CUL4A, IKZF1, IKZF3, and Whole Human Genome

**CUL4A**

|     |      |      |      |         |   |      |      |         |   |      |      |         |   |      |      |     |
|-----|------|------|------|---------|---|------|------|---------|---|------|------|---------|---|------|------|-----|
| TTT | F    | 0.49 | 23.7 | -18 TCT | S | 0.12 | 6.6  | -5 TAT  | Y | 0.45 | 11.8 | -9 TGT  | C | 0.44 | 5.3  | -4  |
| TTC | F    | 0.51 | 25   | -19 TCC | S | 0.19 | 10.5 | -8 TAC  | Y | 0.55 | 14.5 | -11 TGC | C | 0.56 | 6.6  | -5  |
| TTA | L    | 0.15 | 17.1 | -13 TCA | S | 0.14 | 7.9  | -6 TAA  | * | 0    | 0    | 0 TGA   | * | 1    | 1.3  | -1  |
| TTG | L(s) | 0.14 | 15.8 | -12 TCG | S | 0.05 | 2.6  | -2 TAG  | * | 0    | 0    | 0 TGG   | W | 1    | 7.9  | -6  |
| CTT | L    | 0.1  | 11.8 | -9 CCT  | P | 0.22 | 6.6  | -5 CAT  | H | 0.41 | 11.8 | -9 CGT  | R | 0.05 | 2.6  | -2  |
| CTC | L    | 0.18 | 21.1 | -16 CCC | P | 0.3  | 9.2  | -7 CAC  | H | 0.59 | 17.1 | -13 CGC | R | 0.12 | 6.6  | -5  |
| CTA | L    | 0.05 | 5.3  | -4 CCA  | P | 0.26 | 7.9  | -6 CAA  | Q | 0.17 | 9.2  | -7 CGA  | R | 0.05 | 2.6  | -2  |
| CTG | L(s) | 0.39 | 44.7 | -34 CCG | P | 0.22 | 6.6  | -5 CAG  | Q | 0.83 | 44.7 | -34 CGG | R | 0.21 | 11.8 | -9  |
| ATT | I    | 0.29 | 15.8 | -12 ACT | T | 0.24 | 10.5 | -8 AAT  | N | 0.44 | 14.5 | -11 AGT | S | 0.21 | 11.8 | -9  |
| ATC | I    | 0.54 | 28.9 | -22 ACC | T | 0.26 | 11.8 | -9 AAC  | N | 0.56 | 18.4 | -14 AGC | S | 0.3  | 17.1 | -13 |
| ATA | I    | 0.17 | 9.2  | -7 ACA  | T | 0.24 | 10.5 | -8 AAA  | K | 0.41 | 36.8 | -28 AGA | R | 0.47 | 26.3 | -20 |
| ATG | M(s) | 1    | 34.2 | -26 ACG | T | 0.26 | 11.8 | -9 AAG  | K | 0.59 | 54   | -41 AGG | R | 0.12 | 6.6  | -5  |
| GTT | V    | 0.2  | 11.8 | -9 GCT  | A | 0.17 | 9.2  | -7 GAT  | D | 0.34 | 21.1 | -16 GGT | G | 0.11 | 5.3  | -4  |
| GTC | V    | 0.2  | 11.8 | -9 GCC  | A | 0.36 | 19.7 | -15 GAC | D | 0.66 | 40.8 | -31 GGC | G | 0.42 | 21.1 | -16 |
| GTA | V    | 0.11 | 6.6  | -5 GCA  | A | 0.26 | 14.5 | -11 GAA | E | 0.46 | 36.8 | -28 GGA | G | 0.32 | 15.8 | -12 |
| GTG | V    | 0.48 | 27.6 | -21 GCG | A | 0.21 | 11.8 | -9 GAG  | E | 0.54 | 43.4 | -33 GGG | G | 0.16 | 7.9  | -6  |

**IKZF1**

|     |      |      |            |     |   |      |            |     |   |      |            |     |   |      |            |
|-----|------|------|------------|-----|---|------|------------|-----|---|------|------------|-----|---|------|------------|
| TTT | F    | 0.22 | 3.9 ( 2)   | TCT | S | 0.05 | 5.8 ( 3)   | TAT | Y | 0.13 | 3.9 ( 2)   | TGT | C | 0.3  | 11.5 ( 6)  |
| TTC | F    | 0.78 | 13.5 ( 7)  | TCC | S | 0.26 | 28.9 ( 15) | TAC | Y | 0.87 | 25 ( 13)   | TGC | C | 0.7  | 26.9 ( 14) |
| TTA | L    | 0.05 | 3.9 ( 2)   | TCA | S | 0.05 | 5.8 ( 3)   | TAA | * | 1    | 1.9 ( 1)   | TGA | * | 0    | 0 ( 0)     |
| TTG | L(s) | 0.07 | 5.8 ( 3)   | TCG | S | 0.17 | 19.2 ( 10) | TAG | * | 0    | 0 ( 0)     | TGG | W | 0    | 0 ( 0)     |
| CTT | L    | 0.1  | 7.7 ( 4)   | CCT | P | 0.19 | 9.6 ( 5)   | CAT | H | 0.08 | 3.9 ( 2)   | CGT | R | 0.1  | 5.8 ( 3)   |
| CTC | L    | 0.29 | 23.1 ( 12) | CCC | P | 0.35 | 17.3 ( 9)  | CAC | H | 0.92 | 46.1 ( 24) | CGC | R | 0.35 | 21.1 ( 11) |
| CTA | L    | 0.05 | 3.9 ( 2)   | CCA | P | 0.08 | 3.9 ( 2)   | CAA | Q | 0.3  | 11.5 ( 6)  | CGA | R | 0.16 | 9.6 ( 5)   |
| CTG | L(s) | 0.45 | 36.5 ( 19) | CCG | P | 0.38 | 19.2 ( 10) | CAG | Q | 0.7  | 26.9 ( 14) | CGG | R | 0.16 | 9.6 ( 5)   |
| ATT | I    | 0.19 | 5.8 ( 3)   | ACT | T | 0.26 | 9.6 ( 5)   | AAT | N | 0.28 | 13.5 ( 7)  | AGT | S | 0.09 | 9.6 ( 5)   |
| ATC | I    | 0.69 | 21.1 ( 11) | ACC | T | 0.42 | 15.4 ( 8)  | AAC | N | 0.72 | 34.6 ( 18) | AGC | S | 0.38 | 42.3 ( 22) |
| ATA | I    | 0.13 | 3.9 ( 2)   | ACA | T | 0.05 | 1.9 ( 1)   | AAA | K | 0.41 | 23.1 ( 12) | AGA | R | 0.13 | 7.7 ( 4)   |
| ATG | M(s) | 1    | 36.5 ( 19) | ACG | T | 0.26 | 9.6 ( 5)   | AAG | K | 0.59 | 32.7 ( 17) | AGG | R | 0.1  | 5.8 ( 3)   |
| GTT | V    | 0.2  | 9.6 ( 5)   | GCT | A | 0.07 | 3.9 ( 2)   | GAT | D | 0.39 | 21.1 ( 11) | GGT | G | 0.1  | 7.7 ( 4)   |
| GTC | V    | 0.28 | 13.5 ( 7)  | GCC | A | 0.67 | 34.6 ( 18) | GAC | D | 0.61 | 32.7 ( 17) | GGC | G | 0.38 | 28.9 ( 15) |
| GTA | V    | 0.08 | 3.9 ( 2)   | GCA | A | 0.07 | 3.9 ( 2)   | GAA | E | 0.32 | 26.9 ( 14) | GGA | G | 0.23 | 17.3 ( 9)  |
| GTG | V    | 0.44 | 21.1 ( 11) | GCG | A | 0.19 | 9.6 ( 5)   | GAG | E | 0.68 | 57.7 ( 30) | GGG | G | 0.3  | 23.1 ( 12) |

**IKZF3**

|     |      |      |            |     |   |      |            |     |   |      |            |     |   |      |            |
|-----|------|------|------------|-----|---|------|------------|-----|---|------|------------|-----|---|------|------------|
| TTT | F    | 0.36 | 9.8 ( 5)   | TCT | S | 0.18 | 17.6 ( 9)  | TAT | Y | 0.65 | 25.5 ( 13) | TGT | C | 0.5  | 17.6 ( 9)  |
| TTC | F    | 0.64 | 17.6 ( 9)  | TCC | S | 0.08 | 7.8 ( 4)   | TAC | Y | 0.35 | 13.7 ( 7)  | TGC | C | 0.5  | 17.6 ( 9)  |
| TTA | L    | 0.14 | 9.8 ( 5)   | TCA | S | 0.14 | 13.7 ( 7)  | TAA | * | 0    | 0 ( 0)     | TGA | * | 1    | 2 ( 1)     |
| TTG | L(s) | 0.09 | 5.9 ( 3)   | TCG | S | 0.04 | 3.9 ( 2)   | TAG | * | 0    | 0 ( 0)     | TGG | W | 0    | 0 ( 0)     |
| CTT | L    | 0.17 | 11.8 ( 6)  | CCT | P | 0.29 | 15.7 ( 8)  | CAT | H | 0.35 | 15.7 ( 8)  | CGT | R | 0.06 | 3.9 ( 2)   |
| CTC | L    | 0.31 | 21.6 ( 11) | CCC | P | 0.36 | 19.6 ( 10) | CAC | H | 0.65 | 29.4 ( 15) | CGC | R | 0.29 | 19.6 ( 10) |
| CTA | L    | 0    | 0 ( 0)     | CCA | P | 0.29 | 15.7 ( 8)  | CAA | Q | 0.29 | 9.8 ( 5)   | CGA | R | 0.09 | 5.9 ( 3)   |
| CTG | L(s) | 0.29 | 19.6 ( 10) | CCG | P | 0.07 | 3.9 ( 2)   | CAG | Q | 0.71 | 23.5 ( 12) | CGG | R | 0.11 | 7.8 ( 4)   |
| ATT | I    | 0.21 | 7.8 ( 4)   | ACT | T | 0.32 | 11.8 ( 6)  | AAT | N | 0.59 | 31.4 ( 16) | AGT | S | 0.26 | 25.5 ( 13) |
| ATC | I    | 0.53 | 19.6 ( 10) | ACC | T | 0.26 | 9.8 ( 5)   | AAC | N | 0.41 | 21.6 ( 11) | AGC | S | 0.3  | 29.4 ( 15) |
| ATA | I    | 0.26 | 9.8 ( 5)   | ACA | T | 0.26 | 9.8 ( 5)   | AAA | K | 0.53 | 31.4 ( 16) | AGA | R | 0.37 | 25.5 ( 13) |
| ATG | M(s) | 1    | 39.2 ( 20) | ACG | T | 0.16 | 5.9 ( 3)   | AAG | K | 0.47 | 27.4 ( 14) | AGG | R | 0.09 | 5.9 ( 3)   |
| GTT | V    | 0.27 | 13.7 ( 7)  | GCT | A | 0.11 | 5.9 ( 3)   | GAT | D | 0.46 | 23.5 ( 12) | GGT | G | 0.16 | 7.8 ( 4)   |
| GTC | V    | 0.27 | 13.7 ( 7)  | GCC | A | 0.37 | 19.6 ( 10) | GAC | D | 0.54 | 27.4 ( 14) | GGC | G | 0.24 | 11.8 ( 6)  |
| GTA | V    | 0.04 | 2 ( 1)     | GCA | A | 0.37 | 19.6 ( 10) | GAA | E | 0.52 | 51 ( 26)   | GGA | G | 0.36 | 17.6 ( 9)  |
| GTG | V    | 0.42 | 21.6 ( 11) | GCG | A | 0.15 | 7.8 ( 4)   | GAG | E | 0.48 | 47.1 ( 24) | GGG | G | 0.24 | 11.8 ( 6)  |

**Whole Human Genome**

|     |   |      |      |          |     |   |      |      |          |     |   |      |      |          |     |   |      |      |         |
|-----|---|------|------|----------|-----|---|------|------|----------|-----|---|------|------|----------|-----|---|------|------|---------|
| UUU | F | 0.46 | 17.6 | -714298  | UCU | S | 0.19 | 15.2 | -618711  | UAU | Y | 0.44 | 12.2 | -495699  | UGU | C | 0.46 | 10.6 | -430311 |
| UUC | F | 0.54 | 20.3 | -824692  | UCC | S | 0.22 | 17.7 | -718892  | UAC | Y | 0.56 | 15.3 | -622407  | UGC | C | 0.54 | 12.6 | -513028 |
| UUA | L | 0.08 | 7.7  | -311881  | UCA | S | 0.15 | 12.2 | -496448  | UAA | * | 0.3  | 1    | -40285   | UGA | * | 0.47 | 1.6  | -63237  |
| UUG | L | 0.13 | 12.9 | -525688  | UCG | S | 0.05 | 4.4  | -179419  | UAG | * | 0.24 | 0.8  | -32109   | UGG | W | 1    | 13.2 | -535595 |
| CUU | L | 0.13 | 13.2 | -536515  | CCU | P | 0.29 | 17.5 | -713233  | CAU | H | 0.42 | 10.9 | -441711  | CGU | R | 0.08 | 4.5  | -184609 |
| CUC | L | 0.2  | 19.6 | -796638  | CCC | P | 0.32 | 19.8 | -804620  | CAC | H | 0.58 | 15.1 | -613713  | CGC | R | 0.18 | 10.4 | -423516 |
| CUA | L | 0.07 | 7.2  | -290751  | CCA | P | 0.28 | 16.9 | -688038  | CAA | Q | 0.27 | 12.3 | -501911  | CGA | R | 0.11 | 6.2  | -250760 |
| CUG | L | 0.4  | 39.6 | -1611801 | CCG | P | 0.11 | 6.9  | -281570  | CAG | Q | 0.73 | 34.2 | -1391973 | CGG | R | 0.2  | 11.4 | -464485 |
| AUU | I | 0.36 | 16   | -650473  | ACU | T | 0.25 | 13.1 | -533609  | AAU | N | 0.47 | 17   | -689701  | AGU | S | 0.15 | 12.1 | -493429 |
| AUC | I | 0.47 | 20.8 | -846466  | ACC | T | 0.36 | 18.9 | -768147  | AAC | N | 0.53 | 19.1 | -776603  | AGC | S | 0.24 | 19.5 | -791383 |
| AUA | I | 0.17 | 7.5  | -304565  | ACA | T | 0.28 | 15.1 | -614523  | AAA | K | 0.43 | 24.4 | -993621  | AGA | R | 0.21 | 12.2 | -494682 |
| AUG | M | 1    | 22   | -896005  | ACG | T | 0.11 | 6.1  | -246105  | AAG | K | 0.57 | 31.9 | -1295568 | AGG | R | 0.21 | 12   | -486463 |
| GUU | V | 0.18 | 11   | -448607  | GCU | A | 0.27 | 18.4 | -750096  | GAU | D | 0.46 | 21.8 | -885429  | GGU | G | 0.16 | 10.8 | -437126 |
| GUC | V | 0.24 | 14.5 | -588138  | GCC | A | 0.4  | 27.7 | -1127679 | GAC | D | 0.54 | 25.1 | -1020595 | GGC | G | 0.34 | 22.2 | -903565 |
| GUA | V | 0.12 | 7.1  | -287712  | GCA | A | 0.23 | 15.8 | -643471  | GAA | E | 0.42 | 29   | -1177632 | GGA | G | 0.25 | 16.5 | -669873 |
| GUG | V | 0.46 | 28.1 | -1143534 | GCG | A | 0.11 | 7.4  | -299495  | GAG | E | 0.58 | 39.6 | -1609975 | GGG | G | 0.25 | 16.5 | -669768 |
